# Supplementary material for: Mechanistic insights into copper-mediated benzylic C(sp3)–H bond trifluoromethylation
Source: Royal Society of Chemistry journal article supplement (doi:10.1039/d4ob01305k), 2024-01-01
Supplement: d4ob01305k1.pdf [file d4ob01305k1.pdf]

## *Supporting Information*

### **Mechanistic Insights into Copper-Mediated Benzylic C(*sp*<sup>3</sup>)-H Bond Trifluoromethylation**

Xiahe Chen, Hang Liu, Debo Ding, Huiling Li, Yuanbin She, Yun-Fang Yang \*

College of Chemical Engineering, Zhejiang University of Technology, Hangzhou, Zhejiang  
310014, China

\*E-mail: yangyf@zjut.edu.cn

### **Table of Contents**

|                                                                                                |     |
|------------------------------------------------------------------------------------------------|-----|
| Marcus theory calculations for the free energy of activation of single-electron transfer ..... | S2  |
| Different conformers for the <b>INT1</b> .....                                                 | S3  |
| Different conformers for the <b>TS3</b> .....                                                  | S4  |
| Analysis of radical recombination step for secondary radical.....                              | S5  |
| Analysis of radical recombination step for tertiary radical .....                              | S6  |
| The IRC path for <b>TS7</b> .....                                                              | S7  |
| The IRC path for <b>TS8</b> .....                                                              | S8  |
| Electronic energies and free energies.....                                                     | S8  |
| Cartesian coordinates of the structures .....                                                  | S10 |

## Marcus theory calculations for the free energy of activation of single-electron transfer

The activation free energies of the single-electron transfer reactions were calculated using modified Marcus theory using (U)M06/def2-TZVP(IEFPCM $\epsilon = 9.2$ )/(U)M06/6-31G(d)-SDD level of theory. The SET pathway is shown as Scheme S1:

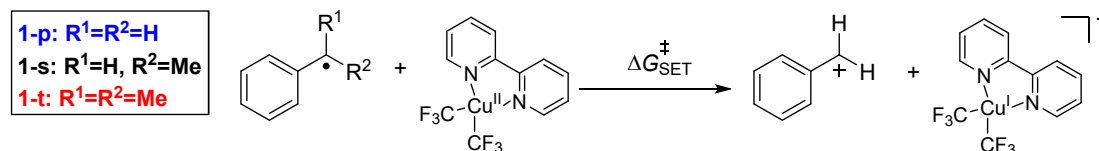

**Scheme S1.** The SET pathway of copper-mediated benzylic C( $sp^3$ )-H bond trifluoromethylation

The following equation was used to calculate the activation free energy of activation ( $\Delta G_{\text{SET}}^\ddagger$ ) in the SET pathway:

$$\Delta G_{\text{SET}}^\ddagger = \Delta G_0^\ddagger \left(1 + \frac{\Delta_r G}{4\Delta G_0^\ddagger}\right)^2$$

Here, the reaction energies for **1-p**, **1-s**, and **1-t** obtained from DFT calculations are  $\Delta_r G_p = 38.0$  kcal/mol,  $\Delta_r G_s = 30.1$  kcal/mol, and  $\Delta_r G_t = 24.8$  kcal/mol, respectively. The intrinsic barrier is determined using  $\Delta G_0^\ddagger = \lambda_0/4$ , where  $\lambda_0$  is the solvent reorganization energy that can be calculated as follows:

$$\lambda_0 = A * [(2r_D)^{-1} + (2r_A)^{-1} - (r_D + r_A)^{-1}]$$

where  $r_D$  and  $r_A$  are the hard sphere radii of electron donor and acceptor, respectively. The  $r_D$  and  $r_A$  values were calculated using the Multiwfn program. A is an empirical constant. Here we use  $A = 99$  kcal/mol Å as suggested in the Coote and Matyjaszewski's study.<sup>1</sup> Thus,

$$\text{primary: } \lambda_0 = 99 \times [1/(3.17 \times 2) + 1/(4.14 \times 2) - 1/(3.17 + 4.14)] = 14.0 \text{ kcal/mol}$$

$$\text{secondary: } \lambda_0 = 99 \times [1/(3.34 \times 2) + 1/(4.14 \times 2) - 1/(3.34 + 4.14)] = 13.5 \text{ kcal/mol}$$

$$\text{tertiary: } \lambda_0 = 99 \times [1/(3.48 \times 2) + 1/(4.14 \times 2) - 1/(3.48 + 4.14)] = 13.2 \text{ kcal/mol}$$

<sup>1</sup>Lin, C. Y.; Coote, M. L.; Gennaro, A.; Matyjaszewski, K. Ab Initio Evaluation of the Thermodynamic and Electrochemical Properties of Alkyl Halides and Radicals and Their Mechanistic Implications for Atom Transfer Radical Polymerization. *J. Am. Chem. Soc.* **2008**, *130*,

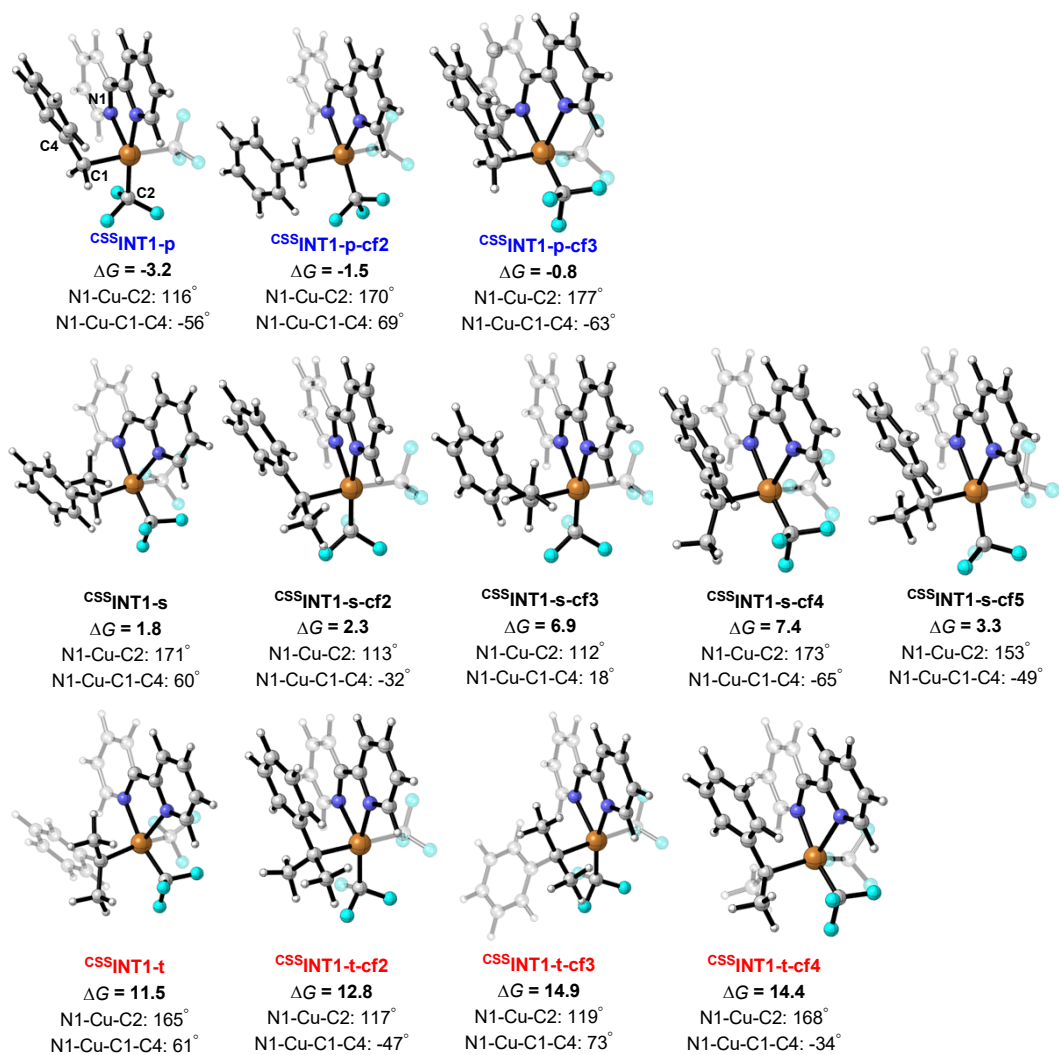

**Figure S1.** Different conformers for the  $\text{CSS|INT1-p}$ ,  $\text{CSS|INT1-s}$  and  $\text{CSS|INT1-t}$ . The energies are shown in kcal/mol.

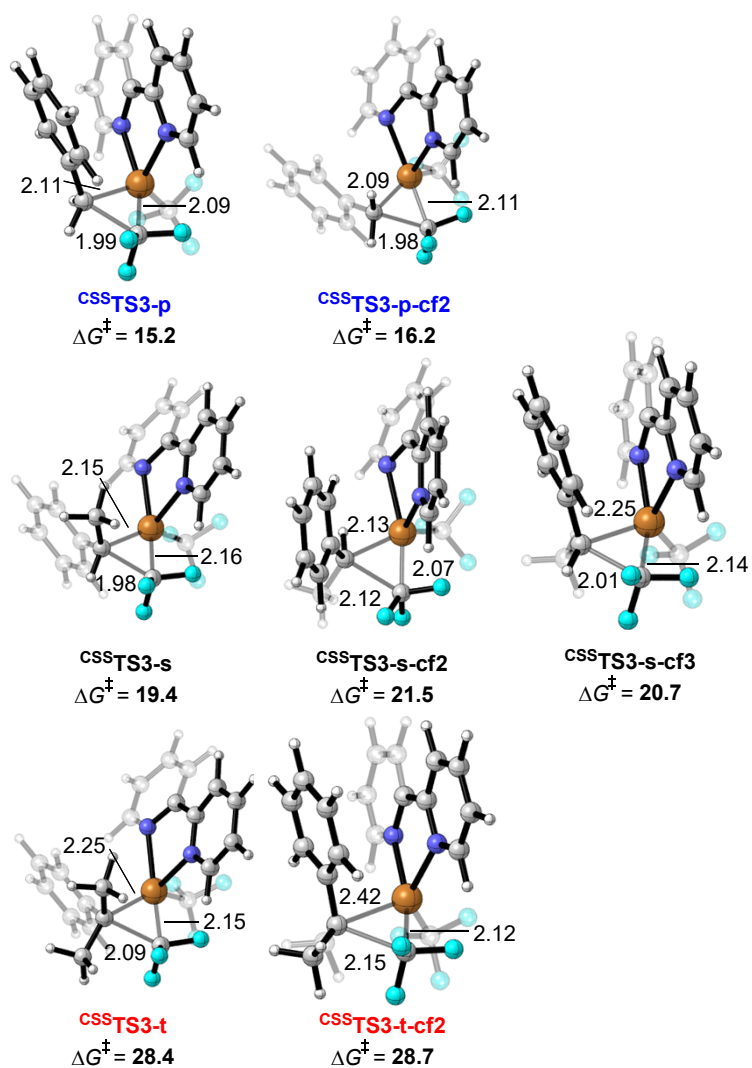

**Figure S2.** Different conformers for the reductive elimination transition state  $\text{CSS-TS3-p}$ ,  $\text{CSS-TS3-s}$  and  $\text{CSS-TS3-t}$ . Distances are in Å, and energies are in kcal/mol.

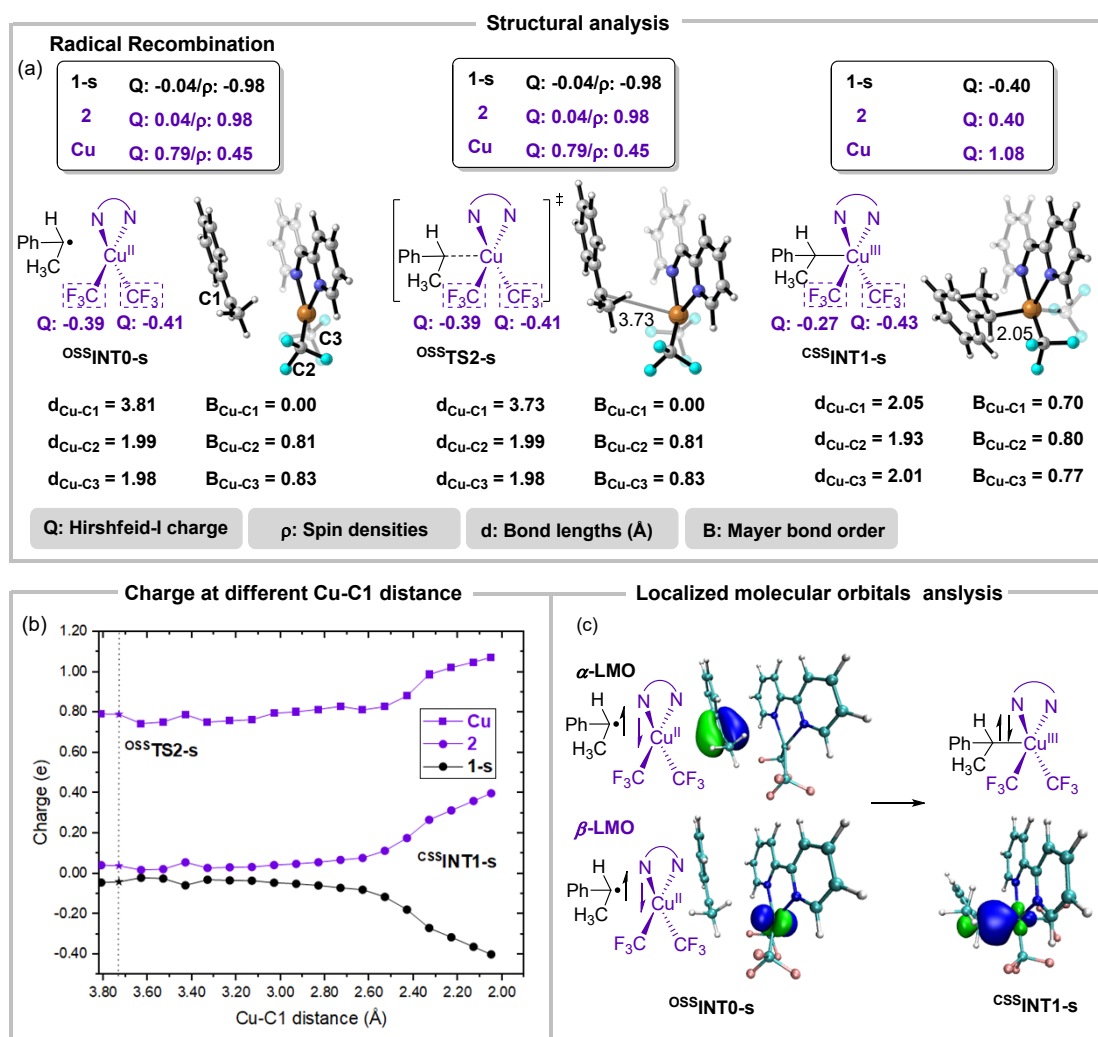

**Figure S3.** (a) Optimized geometries, Hirshfeld-I charge, spin densities, bond lengths, and Mayer bond orders of computed structures in the radical recombination step (secondary radical); (b) Hirshfeld-I charge changes along the reaction coordinate. (c) Localized molecular orbitals analysis of OSS|INT0-s and CSS|INT1-s.

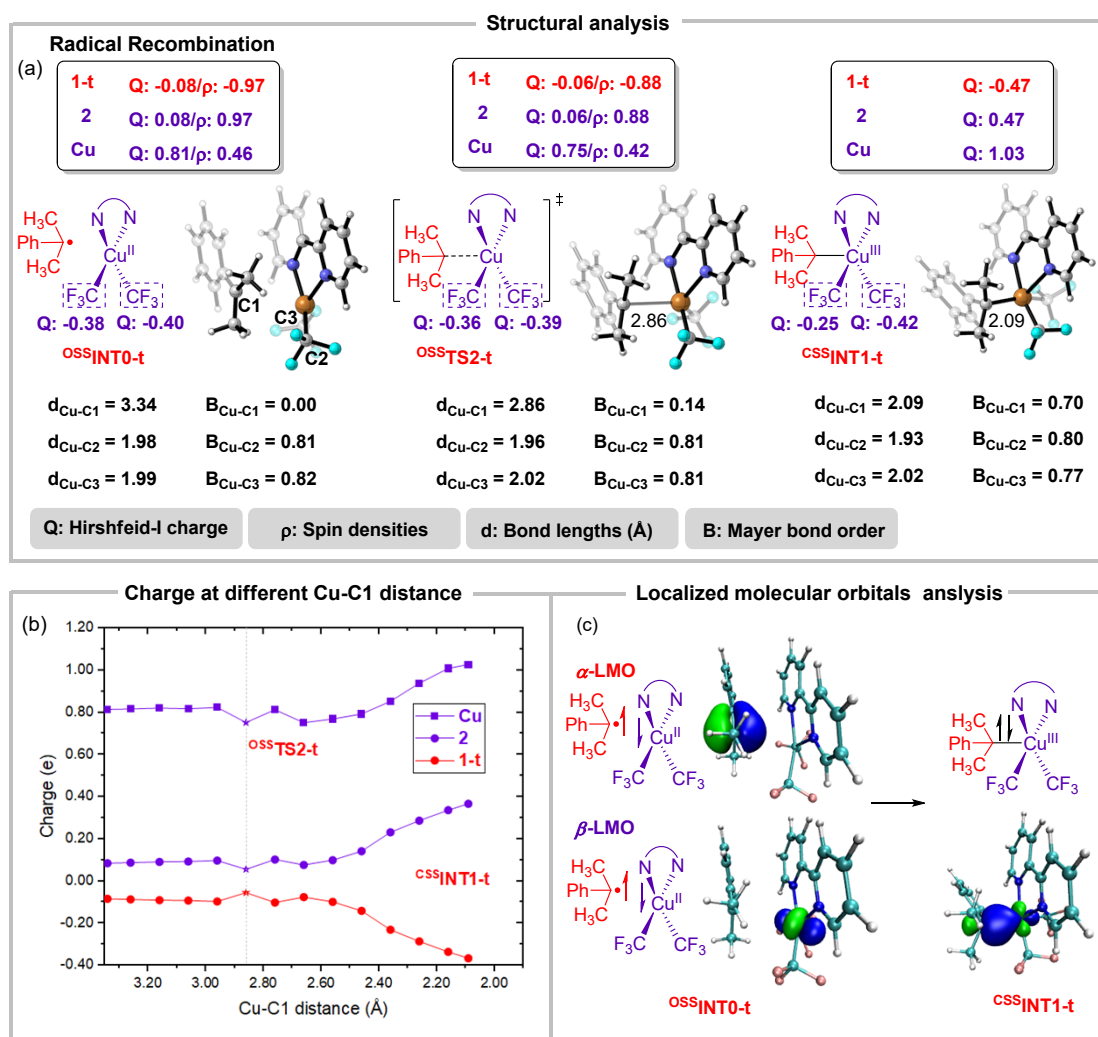

**Figure S4.** (a) Optimized geometries, Hirshfeld-I charge, spin densities, bond lengths, and Mayer bond orders of computed structures in the radical recombination step (tertiary radical); (b) Hirshfeld-I charge changes along the reaction coordinate. (c) Localized molecular orbitals analysis of OSSINT0-t and CSSINT1-t.

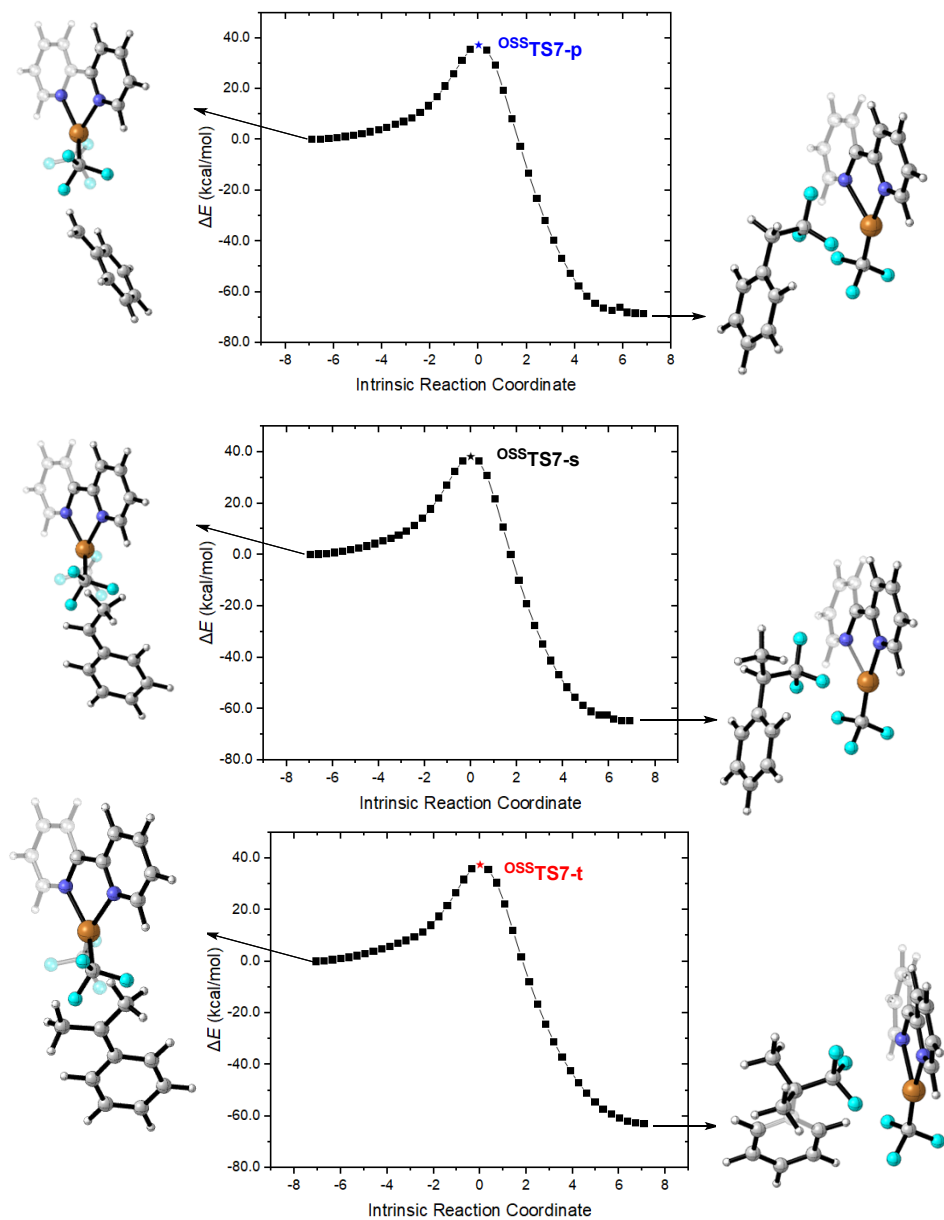

**Figure S5.** The IRC path for  $\text{OSS}^{\text{TS7-p}}$ ,  $\text{OSS}^{\text{TS7-s}}$  and  $\text{OSS}^{\text{TS7-t}}$ . The displayed intermediates were obtained through structural optimization.

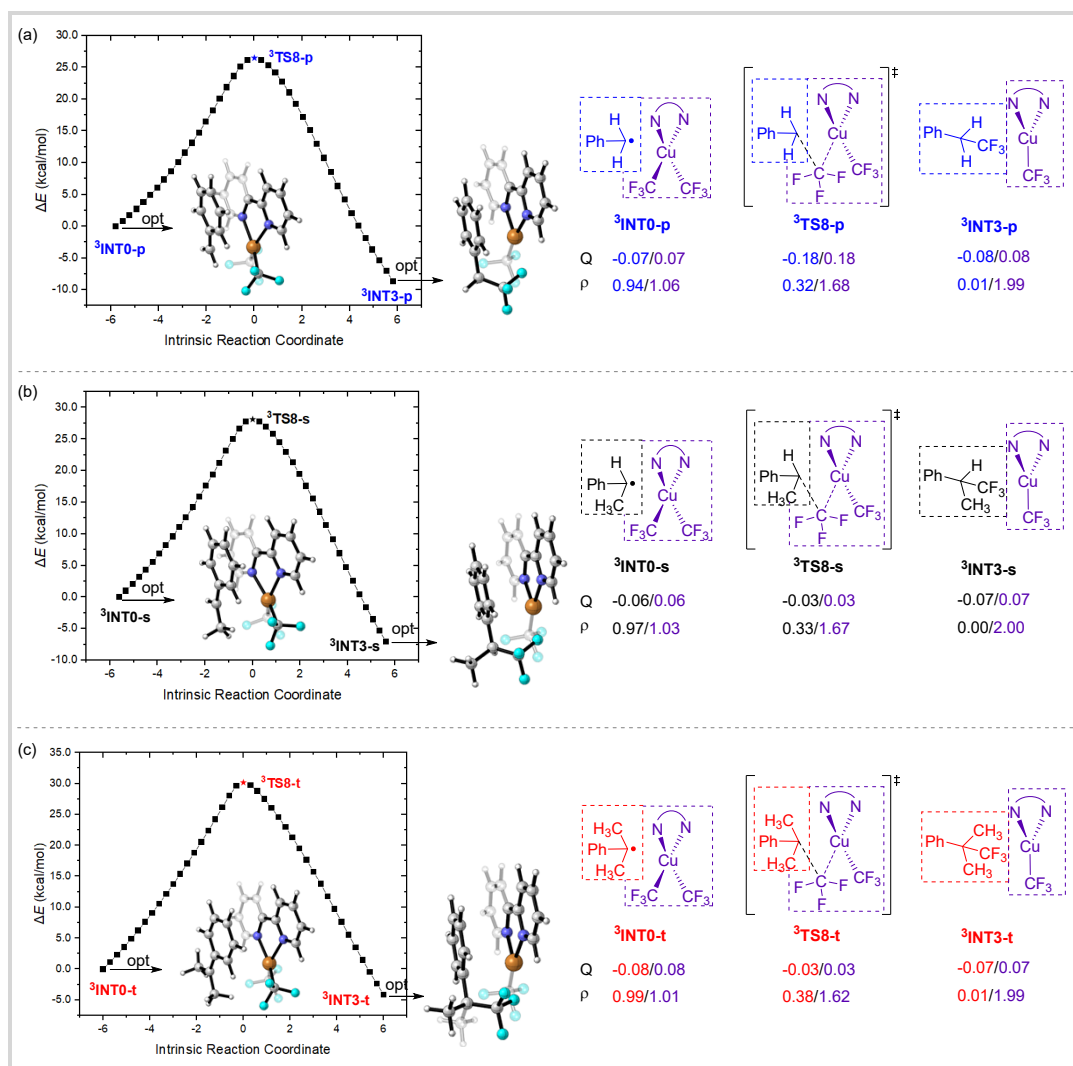

**Figure S6.** Analysis of the IRC paths for (a)  ${}^3\text{TS8-p}$ , (b)  ${}^3\text{TS8-s}$ , and (c)  ${}^3\text{TS8-t}$ , along with the corresponding changes in Hirshfeld-I charge and spin densities. The displayed intermediates were obtained through structural optimization.

**Table S1.** Electronic Energies and Free Energies (in Hartree) of the Structures Calculated at the (U)M06/def2-TZVP(IEFPCM $_{\epsilon=9.2}$ )/(U)M06/6-31G(d)-SDD Level

| Structures | ZPVE     | TCE      | TCH      | TCG      | Esol         | $G_{\text{sol}}(E_{\text{sol}}+\text{TCG})$ |
|------------|----------|----------|----------|----------|--------------|---------------------------------------------|
| <b>1-p</b> | 0.114193 | 0.119909 | 0.120853 | 0.084506 | -270.788986  | -270.704480                                 |
| <b>1-s</b> | 0.142553 | 0.149913 | 0.150858 | 0.110408 | -310.088981  | -309.978573                                 |
| <b>1-t</b> | 0.170646 | 0.179619 | 0.180563 | 0.136071 | -349.387556  | -349.251485                                 |
| <b>2</b>   | 0.187111 | 0.206683 | 0.207627 | 0.136377 | -2811.027601 | -2810.891224                                |
| <b>2</b>   | 0.187004 | 0.206661 | 0.207605 | 0.135472 | -2811.013076 | -2810.877604                                |



|                             |          |          |          |          |              |              |
|-----------------------------|----------|----------|----------|----------|--------------|--------------|
| <b>4-p</b>                  | 0.134490 | 0.143519 | 0.144463 | 0.099083 | -608.524433  | -608.425350  |
| <b>4-s</b>                  | 0.162570 | 0.173069 | 0.174013 | 0.125324 | -647.819416  | -647.694092  |
| <b>4-t</b>                  | 0.190837 | 0.202499 | 0.203443 | 0.152853 | -687.113083  | -686.960230  |
| <b><sup>1</sup>5</b>        | 0.172663 | 0.187909 | 0.188853 | 0.127138 | -2473.393676 | -2473.266538 |
| <b><sup>2</sup>TS1</b>      | 0.185889 | 0.205251 | 0.206196 | 0.134112 | -2811.005566 | -2810.871454 |
| <b><sup>OSS</sup>TS2-p</b>  | 0.302312 | 0.328388 | 0.329332 | 0.244562 | -3081.830422 | -3081.585860 |
| <b><sup>OSS</sup>TS2-s</b>  | 0.330685 | 0.358388 | 0.359332 | 0.270822 | -3121.128192 | -3120.857370 |
| <b><sup>OSS</sup>TS2-t</b>  | 0.359653 | 0.388587 | 0.389531 | 0.298566 | -3160.422286 | -3160.123720 |
| <b><sup>CSS</sup>TS3-p</b>  | 0.305702 | 0.330785 | 0.331729 | 0.249461 | -3081.820919 | -3081.571458 |
| <b><sup>CSS</sup>TS3-s</b>  | 0.333889 | 0.360581 | 0.361525 | 0.275953 | -3121.114768 | -3120.838815 |
| <b><sup>CSS</sup>TS3-t</b>  | 0.361503 | 0.389553 | 0.390497 | 0.302635 | -3160.400155 | -3160.097520 |
| <b><sup>CSS</sup>TS4-p</b>  | 0.305551 | 0.330815 | 0.331760 | 0.248941 | -3081.818454 | -3081.569513 |
| <b><sup>OSS</sup>TS5-p</b>  | 0.302347 | 0.328506 | 0.329450 | 0.243911 | -3081.811719 | -3081.567808 |
| <b><sup>CSS</sup>TS6-p</b>  | 0.305869 | 0.331219 | 0.332163 | 0.248684 | -3081.819974 | -3081.571290 |
| <b><sup>OSS</sup>TS7-p</b>  | 0.301441 | 0.328726 | 0.329670 | 0.238810 | -3081.752242 | -3081.513432 |
| <b><sup>OSS</sup>TS7-s</b>  | 0.330319 | 0.358950 | 0.359894 | 0.266704 | -3121.051827 | -3120.785123 |
| <b><sup>OSS</sup>TS7-t</b>  | 0.358011 | 0.388345 | 0.389289 | 0.292601 | -3160.350979 | -3160.058378 |
| <b><sup>3</sup>TS8-p</b>    | 0.303635 | 0.328959 | 0.329903 | 0.247318 | -3081.764727 | -3081.517409 |
| <b><sup>3</sup>TS8-s</b>    | 0.330943 | 0.357970 | 0.358914 | 0.271989 | -3121.055861 | -3120.783872 |
| <b><sup>3</sup>TS8-t</b>    | 0.358269 | 0.386842 | 0.387786 | 0.298702 | -3160.353403 | -3160.054701 |
| <b><sup>CSS</sup>INT1-p</b> | 0.306626 | 0.331892 | 0.332836 | 0.250574 | -3081.851455 | -3081.600881 |
| <b><sup>CSS</sup>INT1-s</b> | 0.335100 | 0.361978 | 0.362922 | 0.276304 | -3121.143153 | -3120.866849 |
| <b><sup>CSS</sup>INT1-t</b> | 0.362816 | 0.391067 | 0.392011 | 0.303094 | -3160.427413 | -3160.124319 |
| <b><sup>CSS</sup>INT2-p</b> | 0.306719 | 0.332481 | 0.333425 | 0.247886 | -3081.852954 | -3081.605068 |

**ZPVE** = zero-point vibrational energy; **TCE** = thermal correction to energy; **TCH** = thermal correction to enthalpy; **TCG** = thermal correction to Gibbs free energy.

## Cartesian coordinates of the structures

### 1-p

|   |             |             |             |
|---|-------------|-------------|-------------|
| C | 1.83280900  | 0.00000000  | -0.00000500 |
| C | 1.12959600  | 1.20885200  | -0.00000300 |
| C | -0.25196700 | 1.21483300  | 0.00000100  |
| C | -0.99068300 | 0.00000000  | 0.00000300  |
| C | -0.25196700 | -1.21483300 | 0.00000000  |
| C | 1.12959600  | -1.20885200 | -0.00000300 |
| H | 2.92142200  | 0.00000000  | -0.00000800 |
| H | 1.67376700  | 2.15238600  | -0.00000400 |
| H | -0.79913400 | 2.15800400  | 0.00000300  |
| H | -0.79913400 | -2.15800400 | 0.00000200  |
| H | 1.67376700  | -2.15238600 | -0.00000500 |
| C | -2.39119600 | 0.00000000  | 0.00000700  |
| H | -2.95390900 | 0.93141200  | 0.00000900  |
| H | -2.95390900 | -0.93141200 | 0.00000800  |

### 1-s

|   |             |             |             |
|---|-------------|-------------|-------------|
| C | -2.29040300 | 0.35117300  | 0.00002900  |
| C | -1.32731400 | 1.36291400  | 0.00004200  |
| C | 0.02123900  | 1.05282700  | 0.00002300  |
| C | 0.46012900  | -0.29736700 | -0.00001100 |
| C | -0.53886000 | -1.30630400 | -0.00001800 |
| C | -1.88274000 | -0.98631000 | 0.00000000  |
| H | -3.34974300 | 0.60226800  | 0.00004300  |
| H | -1.63873000 | 2.40695600  | 0.00007100  |
| H | 0.75974400  | 1.85410900  | 0.00004500  |
| H | -0.22348700 | -2.35059500 | -0.00004100 |
| H | -2.62770300 | -1.78110300 | -0.00000900 |
| C | 1.82568300  | -0.64894900 | -0.00003000 |
| H | 2.06818700  | -1.71303700 | 0.00001200  |
| C | 2.94360900  | 0.33265900  | -0.00003700 |
| H | 2.91355300  | 0.99313800  | 0.88192400  |
| H | 3.91694900  | -0.16915000 | -0.00035900 |
| H | 2.91317400  | 0.99355500  | -0.88166700 |

### 1-t

|   |             |             |             |
|---|-------------|-------------|-------------|
| C | -2.64835100 | 0.00000000  | -0.00000100 |
| C | -1.94148000 | -1.20345000 | 0.00002600  |
| C | -0.55766000 | -1.20839000 | 0.00002500  |
| C | 0.18676100  | 0.00000000  | 0.00000000  |
| C | -0.55766000 | 1.20839000  | -0.00002500 |

|   |             |             |             |
|---|-------------|-------------|-------------|
| C | -1.94148000 | 1.20345000  | -0.00002700 |
| H | -3.73706100 | 0.00000000  | -0.00000100 |
| H | -2.48082300 | -2.15014500 | 0.00004900  |
| H | -0.03171500 | -2.16188000 | 0.00005200  |
| H | -0.03171500 | 2.16188000  | -0.00005200 |
| H | -2.48082300 | 2.15014500  | -0.00005000 |
| C | 1.61108200  | 0.00000000  | 0.00000000  |
| C | 2.36806200  | -1.28923800 | -0.00003800 |
| H | 2.13424200  | -1.90891400 | -0.88099900 |
| H | 3.45037300  | -1.11742700 | -0.00016500 |
| H | 2.13444400  | -1.90885000 | 0.88102400  |
| C | 2.36806100  | 1.28923800  | 0.00003900  |
| H | 2.13424200  | 1.90891400  | 0.88100100  |
| H | 3.45037300  | 1.11742800  | 0.00016600  |
| H | 2.13444300  | 1.90885000  | -0.88102300 |

**<sup>22</sup>**

|    |             |             |             |
|----|-------------|-------------|-------------|
| Cu | 0.70941300  | 0.00000000  | 0.00000200  |
| C  | 2.00793100  | 1.34334400  | 0.65066000  |
| C  | 2.00792500  | -1.34334900 | -0.65066100 |
| F  | 1.47186300  | 2.11856400  | 1.63756400  |
| F  | 3.17132400  | 0.88566200  | 1.13106400  |
| F  | 2.32989900  | -2.22243600 | 0.34471700  |
| F  | 1.47185400  | -2.11855900 | -1.63757200 |
| F  | 3.17132200  | -0.88567400 | -1.13105900 |
| F  | 2.32991400  | 2.22242000  | -0.34472300 |
| N  | -0.93358800 | 1.28544000  | -0.30242400 |
| C  | -0.83217400 | 2.59668000  | -0.52708900 |
| C  | -2.14487200 | 0.73006400  | -0.11906900 |
| C  | -1.94387200 | 3.42664400  | -0.59096900 |
| H  | 0.18070700  | 2.97702000  | -0.65142700 |
| C  | -3.30429600 | 1.50175500  | -0.14990100 |
| C  | -3.19902100 | 2.86512300  | -0.39241100 |
| H  | -1.82034300 | 4.48905600  | -0.78285500 |
| H  | -4.27814000 | 1.05184500  | 0.02640100  |
| H  | -4.09340100 | 3.48433700  | -0.41931400 |
| N  | -0.93359200 | -1.28543800 | 0.30242200  |
| C  | -0.83218300 | -2.59667700 | 0.52709600  |
| C  | -2.14487400 | -0.73006000 | 0.11906200  |
| C  | -1.94388400 | -3.42663700 | 0.59097700  |
| H  | 0.18069600  | -2.97702000 | 0.65144200  |
| C  | -3.30430100 | -1.50174700 | 0.14989500  |
| C  | -3.19903100 | -2.86511400 | 0.39241200  |
| H  | -1.82035900 | -4.48904700 | 0.78287300  |

|   |             |             |             |
|---|-------------|-------------|-------------|
| H | -4.27814300 | -1.05183400 | -0.02641000 |
| H | -4.09341200 | -3.48432500 | 0.41931800  |

**23**

|    |             |             |             |
|----|-------------|-------------|-------------|
| Cu | -0.00004100 | -1.19197400 | -0.00001000 |
| C  | 1.00044100  | -1.42255200 | 1.67316400  |
| C  | -1.00056700 | -1.42244200 | -1.67317900 |
| F  | 1.14302700  | -0.29090400 | 2.41068200  |
| F  | 0.48407900  | -2.34473800 | 2.52194200  |
| F  | -2.27574600 | -1.83782800 | -1.41426800 |
| F  | -1.14305400 | -0.29077000 | -2.41067900 |
| F  | -0.48431100 | -2.34466600 | -2.52197800 |
| F  | 2.27558300  | -1.83805900 | 1.41426700  |
| N  | 1.23292600  | 0.46100400  | -0.55040000 |
| C  | 2.48630400  | 0.38050200  | -0.98998000 |
| C  | 0.69929200  | 1.65473200  | -0.24904600 |
| C  | 3.28504900  | 1.50157800  | -1.17313000 |
| H  | 2.85738500  | -0.62309100 | -1.19452000 |
| C  | 1.44421100  | 2.82501300  | -0.39431900 |
| C  | 2.74759600  | 2.74450700  | -0.86483200 |
| H  | 4.30288900  | 1.39540400  | -1.53861900 |
| H  | 1.02383500  | 3.79040500  | -0.12543600 |
| H  | 3.34119800  | 3.64899900  | -0.98104400 |
| N  | -1.23288000 | 0.46109700  | 0.55039700  |
| C  | -2.48626000 | 0.38069100  | 0.98998800  |
| C  | -0.69915200 | 1.65478500  | 0.24905300  |
| C  | -3.28491400 | 1.50182900  | 1.17315600  |
| H  | -2.85742100 | -0.62287400 | 1.19452200  |
| C  | -1.44397600 | 2.82512500  | 0.39434300  |
| C  | -2.74736400 | 2.74471800  | 0.86486500  |
| H  | -4.30275800 | 1.39573400  | 1.53865500  |
| H  | -1.02352500 | 3.79048600  | 0.12546600  |
| H  | -3.34089300 | 3.64925700  | 0.98109100  |

**4-p**

|   |             |             |             |
|---|-------------|-------------|-------------|
| C | -1.87817500 | 0.00061800  | 0.09314600  |
| F | -1.73157500 | 1.05096000  | 0.90705000  |
| F | -3.13531300 | 0.01962000  | -0.36718700 |
| F | -1.73673100 | -1.10608600 | 0.83030300  |
| C | -0.89162500 | 0.03796800  | -1.04565600 |
| H | -1.11391300 | -0.82516400 | -1.68696800 |
| H | -1.10974500 | 0.94365800  | -1.62661800 |
| C | 0.53347600  | 0.01887600  | -0.57164200 |
| C | 1.18393700  | -1.19287000 | -0.33868900 |

|   |            |             |             |
|---|------------|-------------|-------------|
| C | 1.21236200 | 1.21142900  | -0.32308600 |
| C | 2.49447100 | -1.21324200 | 0.12431400  |
| C | 2.52320400 | 1.19465500  | 0.13990900  |
| C | 3.16723400 | -0.01855300 | 0.36297200  |
| H | 0.65153400 | -2.12719200 | -0.51969000 |
| H | 0.70414600 | 2.16109300  | -0.49397600 |
| H | 2.99263200 | -2.16542500 | 0.29898100  |
| H | 3.04382900 | 2.13240800  | 0.32666800  |
| H | 4.19478100 | -0.03310900 | 0.72250300  |

**4-s**

|   |             |             |             |
|---|-------------|-------------|-------------|
| C | -1.73149600 | 0.34182600  | -0.28510400 |
| F | -1.68110100 | -0.43016800 | -1.37841500 |
| F | -3.01150500 | 0.38275000  | 0.11172900  |
| F | -1.38777500 | 1.58051900  | -0.64859300 |
| C | -0.83611600 | -0.17903600 | 0.82007000  |
| C | 0.61690100  | -0.10358900 | 0.41019600  |
| C | 1.41426100  | 0.94071700  | 0.87856600  |
| C | 1.18458500  | -1.04850000 | -0.44677000 |
| C | 2.75217600  | 1.03717300  | 0.51266300  |
| C | 2.52183600  | -0.95450500 | -0.81570900 |
| C | 3.31023100  | 0.08662800  | -0.33561900 |
| H | 0.97611100  | 1.68955400  | 1.53981800  |
| H | 0.57741700  | -1.86387100 | -0.83733700 |
| H | 3.35958000  | 1.85741200  | 0.89181700  |
| H | 2.95004800  | -1.69966800 | -1.48425800 |
| H | 4.35791000  | 0.15710800  | -0.62325700 |
| C | -1.28453200 | -1.56889000 | 1.25840000  |
| H | -2.31316700 | -1.54793800 | 1.63487100  |
| H | -1.24753800 | -2.28377500 | 0.42793800  |
| H | -0.62983700 | -1.94067000 | 2.05415400  |
| H | -0.99416800 | 0.52298800  | 1.65359600  |

**4-t**

|   |             |             |             |
|---|-------------|-------------|-------------|
| C | 1.60509900  | -0.31639200 | -0.52455000 |
| F | 1.29389900  | 0.15776300  | -1.73566100 |
| F | 2.92335900  | -0.13164600 | -0.35368900 |
| F | 1.40278500  | -1.63998000 | -0.54938200 |
| C | 0.79821700  | 0.37501800  | 0.57196100  |
| C | -0.69030100 | 0.17826500  | 0.27999700  |
| C | -1.48079000 | 1.21362900  | -0.22394100 |
| C | -1.30227800 | -1.06138900 | 0.49908500  |
| C | -2.83454200 | 1.02577300  | -0.48583800 |
| C | -2.65302800 | -1.25341900 | 0.23679300  |

|   |             |             |             |
|---|-------------|-------------|-------------|
| C | -3.42822500 | -0.20851300 | -0.25486300 |
| H | -1.04542200 | 2.19127900  | -0.41749800 |
| H | -0.71852100 | -1.90007500 | 0.87185700  |
| H | -3.42503600 | 1.85388000  | -0.87484100 |
| H | -3.10120100 | -2.22907100 | 0.41838300  |
| H | -4.48741200 | -0.35713800 | -0.45807700 |
| C | 1.20534100  | 1.85016100  | 0.57885600  |
| H | 0.59677800  | 2.40252600  | 1.30528700  |
| H | 2.25685200  | 1.95043800  | 0.86945200  |
| H | 1.08636700  | 2.32029800  | -0.40393400 |
| C | 1.18274800  | -0.23280200 | 1.92488500  |
| H | 0.99779200  | -1.31071000 | 1.97347200  |
| H | 2.24717400  | -0.06745200 | 2.13139900  |
| H | 0.59881500  | 0.24881900  | 2.71877200  |

**<sup>15</sup>**

|    |             |             |             |
|----|-------------|-------------|-------------|
| Cu | -0.93807900 | -0.70249000 | 0.00131400  |
| N  | 0.17718000  | 1.28780000  | -0.28223000 |
| C  | -0.34331400 | 2.51035500  | -0.28202900 |
| H  | -1.41606000 | 2.56100700  | -0.47198300 |
| C  | 0.42607000  | 3.64627300  | -0.04382500 |
| H  | -0.03065300 | 4.63279500  | -0.05620700 |
| C  | 1.78006600  | 3.47981200  | 0.21841700  |
| H  | 2.41361700  | 4.34083800  | 0.42288800  |
| C  | 2.32154800  | 2.19911600  | 0.23336200  |
| H  | 3.37310800  | 2.05214600  | 0.47044100  |
| C  | 1.47977400  | 1.11897200  | -0.02904500 |
| N  | 0.97840000  | -1.23398300 | 0.04563000  |
| C  | 1.94091800  | -0.29049100 | -0.02269200 |
| C  | 3.28781900  | -0.64164600 | -0.08699800 |
| H  | 4.05095200  | 0.12834000  | -0.16982100 |
| C  | 3.64541000  | -1.98282200 | -0.07238100 |
| H  | 4.69355300  | -2.26996900 | -0.12705400 |
| C  | 2.64935100  | -2.94768700 | 0.00517000  |
| H  | 2.88287900  | -4.00880900 | 0.01964200  |
| C  | 1.32865700  | -2.52443100 | 0.06055700  |
| H  | 0.50671100  | -3.23562200 | 0.12261500  |
| C  | -2.83562600 | -0.45514500 | 0.04513800  |
| F  | -3.16247700 | 0.78875700  | -0.46335800 |
| F  | -3.59620800 | -1.31716400 | -0.68229400 |
| F  | -3.40164000 | -0.45815600 | 1.28493200  |

**<sup>2</sup>TS1**

|   |            |             |            |
|---|------------|-------------|------------|
| C | 0.51295300 | -1.24780700 | 1.75010200 |
|---|------------|-------------|------------|

|    |             |             |             |
|----|-------------|-------------|-------------|
| C  | 2.47149700  | -0.00118600 | -1.17040600 |
| F  | 0.47252000  | -2.59034700 | 1.62190900  |
| F  | 1.49930200  | -0.95687600 | 2.61236400  |
| F  | -0.64235300 | -0.88097700 | 2.33290600  |
| F  | 3.13301100  | 1.09523100  | -0.66280600 |
| F  | 3.44399000  | -0.92708600 | -1.36015100 |
| F  | 2.10860200  | 0.38857500  | -2.43037300 |
| N  | -1.04402000 | -0.94369700 | -0.62182800 |
| C  | -1.42925300 | -2.16400200 | -0.99288500 |
| C  | -1.95789300 | 0.02835700  | -0.45944800 |
| C  | -2.75836100 | -2.48598800 | -1.23269600 |
| H  | -0.63569600 | -2.90304600 | -1.09671000 |
| C  | -3.31268600 | -0.22188000 | -0.67238300 |
| C  | -3.71393200 | -1.49200800 | -1.06315800 |
| H  | -3.03132700 | -3.49281200 | -1.53692900 |
| H  | -4.05246200 | 0.55929600  | -0.51776600 |
| H  | -4.76833800 | -1.70344800 | -1.22877400 |
| N  | -0.14850100 | 1.39799600  | 0.31051600  |
| C  | 0.41617500  | 2.55631600  | 0.64379000  |
| C  | -1.43831700 | 1.35769400  | -0.05530100 |
| C  | -0.29463000 | 3.75063900  | 0.65874300  |
| H  | 1.47692100  | 2.51314300  | 0.88916400  |
| C  | -2.21480000 | 2.51537500  | -0.07816700 |
| C  | -1.63390300 | 3.72158800  | 0.29174500  |
| H  | 0.19742000  | 4.67763700  | 0.94082200  |
| H  | -3.25280800 | 2.48747200  | -0.39996100 |
| H  | -2.22391700 | 4.63580800  | 0.27911000  |
| Cu | 0.91796900  | -0.44873800 | 0.00365400  |

**ossTS2-p**

|    |             |             |            |
|----|-------------|-------------|------------|
| Cu | 1.04085300  | -0.12325700 | 0.37875600 |
| N  | -0.60604400 | 1.08727500  | 0.84206900 |
| C  | -0.57521000 | 2.42092300  | 0.84339500 |
| H  | 0.37207400  | 2.87154300  | 0.54935600 |
| C  | -1.67632600 | 3.18864900  | 1.19832000 |
| H  | -1.61004300 | 4.27340000  | 1.18752100 |
| C  | -2.84416100 | 2.53542000  | 1.57171200 |
| H  | -3.72491500 | 3.10109800  | 1.86944700 |
| C  | -2.87689800 | 1.14786300  | 1.56765000 |
| H  | -3.77805000 | 0.62049900  | 1.87062700 |
| C  | -1.73422600 | 0.44602800  | 1.18838900 |
| N  | -0.44154200 | -1.54806800 | 0.96102400 |
| C  | -1.66765900 | -1.03115000 | 1.14441400 |
| C  | -2.78704900 | -1.85093800 | 1.27396300 |

|   |             |             |             |
|---|-------------|-------------|-------------|
| H | -3.78051800 | -1.42271800 | 1.38402200  |
| C | -2.61936900 | -3.22844500 | 1.23229700  |
| H | -3.48109700 | -3.88607300 | 1.32838100  |
| C | -1.34409000 | -3.75426800 | 1.06231400  |
| H | -1.17090000 | -4.82662000 | 1.02927000  |
| C | -0.28163500 | -2.87114400 | 0.91987100  |
| H | 0.73556000  | -3.22200100 | 0.75475900  |
| C | 2.22821300  | -1.31190700 | -0.67520400 |
| C | 2.45188100  | 1.17463200  | 0.92906400  |
| F | 1.57155000  | -2.32330500 | -1.33856900 |
| F | 2.94515700  | -0.68376900 | -1.63469100 |
| F | 3.12229700  | -1.95397600 | 0.10979800  |
| F | 2.17955100  | 1.67993100  | 2.16719300  |
| F | 3.71045600  | 0.71878200  | 0.98874700  |
| F | 2.49258000  | 2.26965900  | 0.10986700  |
| C | 0.66821900  | 1.81768000  | -2.49878000 |
| H | 0.70228100  | 2.90552500  | -2.45485100 |
| H | 1.61048500  | 1.28384800  | -2.60402900 |
| C | -0.54671100 | 1.12628500  | -2.39435600 |
| C | -1.78062800 | 1.80746800  | -2.20512100 |
| C | -0.58039600 | -0.29550800 | -2.42269400 |
| C | -2.96024200 | 1.10931100  | -2.02630400 |
| C | -1.76664800 | -0.98363200 | -2.23758200 |
| C | -2.96430000 | -0.29158500 | -2.03119900 |
| H | -1.77806700 | 2.89860000  | -2.19013200 |
| H | 0.34875900  | -0.83899500 | -2.58149500 |
| H | -3.89249000 | 1.65378400  | -1.87640500 |
| H | -1.75969800 | -2.07420000 | -2.24797500 |
| H | -3.89591900 | -0.83770300 | -1.88605000 |

**ossTS2-s**

|    |             |             |            |
|----|-------------|-------------|------------|
| Cu | -1.36000200 | -0.44488400 | 0.32217300 |
| N  | 0.45304600  | 0.38522700  | 0.99536800 |
| C  | 1.47617800  | -0.32843800 | 1.46401300 |
| H  | 1.33645500  | -1.40870800 | 1.47665500 |
| C  | 2.65562900  | 0.26187600  | 1.90211200 |
| H  | 3.47223200  | -0.35733900 | 2.26234600 |
| C  | 2.76430300  | 1.64307700  | 1.83908500 |
| H  | 3.67623300  | 2.14113500  | 2.16237600 |
| C  | 1.69460400  | 2.38932300  | 1.35870500 |
| H  | 1.76056500  | 3.47366200  | 1.31873900 |
| C  | 0.54437100  | 1.72699900  | 0.93978800 |
| N  | -1.71458000 | 1.63748300  | 0.16647100 |
| C  | -0.65469400 | 2.42432500  | 0.42286700 |



|   |             |             |             |
|---|-------------|-------------|-------------|
| C | -0.71505800 | 3.80124100  | 0.21643400  |
| H | 0.14958700  | 4.43217700  | 0.40595300  |
| C | -1.89937700 | 4.36208400  | -0.24300100 |
| H | -1.96511100 | 5.43567300  | -0.40823000 |
| C | -2.99254000 | 3.54097300  | -0.48959400 |
| H | -3.93718300 | 3.94286200  | -0.84586100 |
| C | -2.85055900 | 2.17567700  | -0.27921400 |
| H | -3.66179700 | 1.47618100  | -0.47439100 |
| C | -2.70002300 | -1.01008100 | -1.02879200 |
| C | -1.26448200 | -2.16567500 | 1.30388400  |
| F | -3.96332500 | -0.92705800 | -0.52809700 |
| F | -2.71614900 | -0.20347700 | -2.13505700 |
| F | -2.56754900 | -2.26312800 | -1.50516900 |
| F | -2.37252700 | -2.92079900 | 1.30357900  |
| F | -0.26866900 | -2.96428400 | 0.80910500  |
| F | -0.93697800 | -1.98334600 | 2.61603700  |
| C | 1.63514000  | -1.55005300 | -1.59902400 |
| C | 2.87625200  | -0.93560600 | -1.31923400 |
| C | 3.15798100  | 0.40958700  | -1.67327700 |
| C | 3.89253000  | -1.65445500 | -0.63560700 |
| C | 4.37326200  | 0.99129800  | -1.35266300 |
| C | 5.10626800  | -1.06811000 | -0.32884400 |
| C | 5.35758600  | 0.26265300  | -0.68035200 |
| H | 2.40228200  | 0.99029700  | -2.20246100 |
| H | 3.69607900  | -2.69097700 | -0.35671000 |
| H | 4.56491000  | 2.02605400  | -1.63596000 |
| H | 5.87106600  | -1.64738400 | 0.18748900  |
| H | 6.31491100  | 0.72273200  | -0.44109000 |
| C | 0.52153400  | -0.89746500 | -2.33433800 |
| H | -0.34897600 | -1.55667900 | -2.40576800 |
| H | 0.18503400  | 0.03399500  | -1.84143300 |
| H | 0.81205300  | -0.60959900 | -3.35844400 |
| H | 1.49580400  | -2.57798600 | -1.26036200 |

**ossTS2-t**

|    |             |             |            |
|----|-------------|-------------|------------|
| Cu | -0.37497100 | -0.63521800 | 0.36738300 |
| N  | 0.17082300  | 1.34234700  | 0.44497800 |
| C  | 1.38088400  | 1.72337400  | 0.86203000 |
| H  | 2.10921000  | 0.92763700  | 1.00861900 |
| C  | 1.70320500  | 3.05065000  | 1.11332600 |
| H  | 2.70670200  | 3.30648000  | 1.44356600 |
| C  | 0.72135600  | 4.01395100  | 0.93650800 |
| H  | 0.92784000  | 5.06367300  | 1.13581300 |
| C  | -0.53960600 | 3.62108900  | 0.50723900 |

|   |             |             |             |
|---|-------------|-------------|-------------|
| H | -1.32672600 | 4.36014000  | 0.38345100  |
| C | -0.78905300 | 2.27271800  | 0.26289500  |
| N | -2.25119400 | 0.44230800  | -0.19784500 |
| C | -2.10700600 | 1.77567300  | -0.19143600 |
| C | -3.14363200 | 2.62063000  | -0.58903600 |
| H | -3.01258600 | 3.69960100  | -0.60819900 |
| C | -4.35375800 | 2.06154100  | -0.97683500 |
| H | -5.17540300 | 2.70319800  | -1.28918200 |
| C | -4.49968700 | 0.68031500  | -0.96252500 |
| H | -5.43259000 | 0.20436800  | -1.25344600 |
| C | -3.41301500 | -0.09234500 | -0.57005700 |
| H | -3.46239300 | -1.17965900 | -0.55046500 |
| C | -1.05489900 | -2.42468800 | -0.03421700 |
| C | 0.21191100  | -1.00471300 | 2.26594600  |
| F | -2.06590600 | -2.69788200 | 0.83111000  |
| F | -1.65590300 | -2.52265700 | -1.26809700 |
| F | -0.20993800 | -3.47088800 | 0.03784800  |
| F | -0.12438400 | -2.17845500 | 2.82051800  |
| F | 1.56734800  | -0.90924800 | 2.41172600  |
| F | -0.29616700 | -0.04589800 | 3.09301500  |
| C | 1.02893700  | -0.84531500 | -2.11224400 |
| C | 2.22840300  | -0.30390900 | -1.50789900 |
| C | 2.70955200  | 0.98355800  | -1.83135600 |
| C | 2.98462100  | -1.06284700 | -0.58600000 |
| C | 3.89280100  | 1.46829700  | -1.28983000 |
| C | 4.14831000  | -0.56160800 | -0.02413800 |
| C | 4.62001300  | 0.70352800  | -0.37991400 |
| H | 2.16061000  | 1.59724000  | -2.54492500 |
| H | 2.62214300  | -2.04284500 | -0.27715800 |
| H | 4.24995400  | 2.45601400  | -1.58053600 |
| H | 4.69260500  | -1.16325500 | 0.70200900  |
| H | 5.54414400  | 1.08712100  | 0.04917700  |
| C | 0.10500000  | 0.03483200  | -2.89174900 |
| H | 0.44629000  | 0.15113100  | -3.93758100 |
| H | -0.89645100 | -0.41483600 | -2.93392600 |
| H | 0.00874000  | 1.04158000  | -2.46443200 |
| C | 1.03345900  | -2.28793200 | -2.51422200 |
| H | 1.41201200  | -2.95891300 | -1.73708600 |
| H | 0.03306000  | -2.63352900 | -2.78769800 |
| H | 1.68737100  | -2.41195600 | -3.39604300 |

<sup>css</sup>TS3-p

|    |            |             |             |
|----|------------|-------------|-------------|
| Cu | 1.13960700 | -0.05699600 | -0.03666900 |
| N  | 0.01647100 | 1.72918700  | -0.17490400 |

|                 |             |             |             |
|-----------------|-------------|-------------|-------------|
| C               | 0.46268600  | 2.78955700  | -0.84862500 |
| H               | 1.42180900  | 2.65620400  | -1.35121800 |
| C               | -0.23156500 | 3.99161300  | -0.88811100 |
| H               | 0.15645700  | 4.83026700  | -1.46032700 |
| C               | -1.41458900 | 4.08956200  | -0.16474200 |
| H               | -1.98338800 | 5.01740500  | -0.15726600 |
| C               | -1.85478800 | 2.99873000  | 0.57197100  |
| H               | -2.75439700 | 3.07783600  | 1.17726600  |
| C               | -1.11378900 | 1.81695100  | 0.54203500  |
| N               | -0.56809100 | -0.36185200 | 1.37824500  |
| C               | -1.49945900 | 0.60260800  | 1.29858800  |
| C               | -2.74980600 | 0.46063600  | 1.90075100  |
| H               | -3.50800600 | 1.23312800  | 1.79786800  |
| C               | -3.02862100 | -0.69764600 | 2.61252900  |
| H               | -4.00008000 | -0.82809400 | 3.08549700  |
| C               | -2.05485300 | -1.68314100 | 2.70723400  |
| H               | -2.22842700 | -2.60334400 | 3.25937500  |
| C               | -0.84092400 | -1.47002700 | 2.06543000  |
| H               | -0.04817400 | -2.21748300 | 2.09310100  |
| C               | 1.58460800  | -2.07163800 | -0.37099100 |
| C               | 2.90474000  | 0.75504600  | 0.37695700  |
| F               | 0.88496000  | -3.22873500 | -0.50250800 |
| F               | 2.69852900  | -2.19726200 | -1.08311700 |
| F               | 1.94309700  | -2.12453700 | 0.94168100  |
| F               | 2.85025000  | 1.74415000  | 1.32503400  |
| F               | 3.95974300  | -0.01113900 | 0.74419100  |
| F               | 3.35727800  | 1.42871200  | -0.75563300 |
| C               | 0.44344500  | -1.14516700 | -1.70774600 |
| H               | 0.91076500  | -0.24023600 | -2.13435700 |
| H               | 0.79393800  | -1.97853700 | -2.31706000 |
| C               | -1.03786000 | -1.07508400 | -1.63251200 |
| C               | -1.69424400 | 0.06498200  | -2.11641800 |
| C               | -1.82131600 | -2.12544600 | -1.13588400 |
| C               | -3.08053700 | 0.16127500  | -2.09478600 |
| C               | -3.20614400 | -2.02183000 | -1.09917000 |
| C               | -3.84436100 | -0.87959200 | -1.57625800 |
| H               | -1.10363100 | 0.88772700  | -2.52110900 |
| H               | -1.33787100 | -3.02509300 | -0.76353400 |
| H               | -3.56299900 | 1.05690900  | -2.48427400 |
| H               | -3.79325700 | -2.84768200 | -0.69938500 |
| H               | -4.93045100 | -0.80651400 | -1.55289600 |
| <b>cssTS3-s</b> |             |             |             |
| Cu              | 0.23639900  | -0.42606400 | 0.26909600  |

|   |             |             |             |
|---|-------------|-------------|-------------|
| N | -0.35637100 | 1.59938000  | -0.30565200 |
| C | 0.51022500  | 2.59058400  | -0.08284100 |
| H | 1.56447000  | 2.32294800  | -0.13896700 |
| C | 0.11764200  | 3.88906900  | 0.21223100  |
| H | 0.86563600  | 4.65773600  | 0.38834400  |
| C | -1.24061100 | 4.16240400  | 0.30136600  |
| H | -1.59252200 | 5.16052500  | 0.55493600  |
| C | -2.14831900 | 3.13663800  | 0.07979600  |
| H | -3.21549400 | 3.31831000  | 0.18153800  |
| C | -1.67206900 | 1.86233000  | -0.22800100 |
| N | -2.05983200 | -0.50438800 | -0.31195900 |
| C | -2.58785900 | 0.72053800  | -0.45073900 |
| C | -3.93162300 | 0.90767600  | -0.78444100 |
| H | -4.33096600 | 1.90830700  | -0.93215200 |
| C | -4.74673800 | -0.20165500 | -0.95365200 |
| H | -5.79512900 | -0.07651000 | -1.21791700 |
| C | -4.20205100 | -1.46832800 | -0.78482900 |
| H | -4.80322500 | -2.36683400 | -0.89973400 |
| C | -2.85275900 | -1.56374100 | -0.46690400 |
| H | -2.38293500 | -2.53686500 | -0.32515900 |
| C | 0.42981100  | -2.57203300 | 0.17491600  |
| C | 0.44876100  | 0.02666600  | 2.18404200  |
| F | -0.52483900 | -2.59197100 | 1.13422600  |
| F | 0.02898000  | -3.58394000 | -0.63607800 |
| F | 1.56522600  | -2.96708200 | 0.75505700  |
| F | 0.93771200  | -0.92350600 | 3.02896000  |
| F | 1.26676800  | 1.11426100  | 2.39889500  |
| F | -0.74474600 | 0.40622200  | 2.75204200  |
| C | 1.10064200  | -1.52828200 | -1.36679300 |
| C | 2.10291500  | -0.41457100 | -1.22904800 |
| C | 2.15478700  | 0.62206100  | -2.17120100 |
| C | 3.08935200  | -0.45350000 | -0.22804500 |
| C | 3.16955600  | 1.57148400  | -2.13129900 |
| C | 4.08052300  | 0.51822500  | -0.17116400 |
| C | 4.13380200  | 1.52759200  | -1.12869500 |
| H | 1.39931200  | 0.68558200  | -2.95170400 |
| H | 3.07094000  | -1.24988400 | 0.51313200  |
| H | 3.20103100  | 2.35398100  | -2.88814200 |
| H | 4.82207700  | 0.47699100  | 0.62425200  |
| H | 4.92381900  | 2.27577600  | -1.09335300 |
| C | 0.10098900  | -1.43386800 | -2.49590000 |
| H | -0.62225700 | -2.25225000 | -2.44194100 |
| H | -0.45313500 | -0.48883700 | -2.49496100 |
| H | 0.62580900  | -1.52826200 | -3.45892000 |

|                 |             |             |             |
|-----------------|-------------|-------------|-------------|
| H               | 1.67664900  | -2.45136700 | -1.47046900 |
| <b>cssTS3-t</b> |             |             |             |
| Cu              | 0.27003800  | -0.24896800 | 0.31827600  |
| N               | -0.73923200 | 1.55726500  | -0.45968400 |
| C               | -0.09635300 | 2.71930500  | -0.31964400 |
| H               | 0.99074700  | 2.66814800  | -0.35179700 |
| C               | -0.74622900 | 3.93161700  | -0.13202700 |
| H               | -0.17060700 | 4.84695200  | -0.02123700 |
| C               | -2.13244600 | 3.93102500  | -0.06157500 |
| H               | -2.68267700 | 4.85400700  | 0.11097400  |
| C               | -2.80994000 | 2.72785000  | -0.19683600 |
| H               | -3.89299400 | 2.69694600  | -0.10698000 |
| C               | -2.08233400 | 1.55557600  | -0.40291000 |
| N               | -1.99863100 | -0.84142200 | -0.30104500 |
| C               | -2.75188600 | 0.24186800  | -0.53657900 |
| C               | -4.10088900 | 0.13836800  | -0.88710300 |
| H               | -4.68346100 | 1.02747300  | -1.11632300 |
| C               | -4.68393200 | -1.11738200 | -0.96686200 |
| H               | -5.73233500 | -1.21909200 | -1.24111200 |
| C               | -3.90735900 | -2.23653800 | -0.69623200 |
| H               | -4.32117700 | -3.24103000 | -0.73865000 |
| C               | -2.56999300 | -2.04301200 | -0.37216100 |
| H               | -1.92386900 | -2.89361100 | -0.15741500 |
| C               | 0.75882600  | -2.33638900 | 0.50474300  |
| C               | 0.29605600  | 0.41500200  | 2.18483200  |
| F               | -0.21145800 | -2.34657900 | 1.45782300  |
| F               | 0.45252300  | -3.46227900 | -0.19133700 |
| F               | 1.90009000  | -2.56627300 | 1.15932900  |
| F               | 1.02103100  | -0.28593100 | 3.10272600  |
| F               | 0.76264500  | 1.70417600  | 2.31157500  |
| F               | -0.96727900 | 0.47356000  | 2.71752300  |
| C               | 1.45514300  | -1.38462900 | -1.22126400 |
| C               | 2.13269500  | -0.04637000 | -1.07398400 |
| C               | 2.08040000  | 0.90009500  | -2.10801000 |
| C               | 2.97474200  | 0.21342400  | 0.02307700  |
| C               | 2.85837600  | 2.05144200  | -2.05930800 |
| C               | 3.71979500  | 1.38496500  | 0.08502300  |
| C               | 3.67766100  | 2.30125700  | -0.96156300 |
| H               | 1.43343700  | 0.73097000  | -2.96690800 |
| H               | 3.03737900  | -0.50690500 | 0.83679900  |
| H               | 2.81837100  | 2.76000000  | -2.88548900 |
| H               | 4.34361000  | 1.57418100  | 0.95631900  |
| H               | 4.27963900  | 3.20747300  | -0.92143000 |

|   |             |             |             |
|---|-------------|-------------|-------------|
| C | 0.40775200  | -1.49295400 | -2.30932700 |
| H | 0.90590500  | -1.53651400 | -3.29201000 |
| H | -0.15633100 | -2.42487300 | -2.19910600 |
| H | -0.30194700 | -0.65941700 | -2.31508100 |
| C | 2.55756100  | -2.41589500 | -1.46419200 |
| H | 3.31009700  | -2.43884500 | -0.67276600 |
| H | 2.17096400  | -3.42563800 | -1.62348000 |
| H | 3.06536000  | -2.09286100 | -2.38656200 |

**cssTS4-p**

|    |             |             |             |
|----|-------------|-------------|-------------|
| Cu | 0.09810900  | -0.22270600 | -0.66317000 |
| N  | -0.97999000 | -1.26339600 | 0.89116200  |
| C  | -0.80139400 | -2.52831100 | 1.28720700  |
| H  | -0.00725400 | -3.07764900 | 0.79216300  |
| C  | -1.57033800 | -3.13301700 | 2.27043500  |
| H  | -1.37487000 | -4.16444300 | 2.55171800  |
| C  | -2.57223500 | -2.38898800 | 2.87955200  |
| H  | -3.18903300 | -2.81949100 | 3.66586600  |
| C  | -2.76771000 | -1.07858000 | 2.47453400  |
| H  | -3.52685200 | -0.46436200 | 2.95208800  |
| C  | -1.96013200 | -0.54289600 | 1.46995600  |
| N  | -1.08832000 | 1.38073700  | 0.34008300  |
| C  | -2.13337400 | 0.83931200  | 0.99164800  |
| C  | -3.33271000 | 1.53074500  | 1.16355900  |
| H  | -4.17982900 | 1.05057900  | 1.64661600  |
| C  | -3.45281500 | 2.81648400  | 0.66195500  |
| H  | -4.38623500 | 3.36465000  | 0.77089400  |
| C  | -2.36575200 | 3.38394400  | 0.00825400  |
| H  | -2.40772900 | 4.38904900  | -0.40286200 |
| C  | -1.21532100 | 2.62408700  | -0.12993500 |
| H  | -0.35229200 | 3.03578700  | -0.65514200 |
| C  | 1.47534200  | -1.59509300 | -0.91590400 |
| C  | -1.29358100 | -0.03358300 | -2.19044200 |
| F  | 2.40052300  | -1.53805800 | -1.88110100 |
| F  | 2.11888200  | -1.91472600 | 0.22073400  |
| F  | 0.69559200  | -2.65375000 | -1.22986300 |
| F  | -2.61695700 | 0.02645600  | -1.80178100 |
| F  | -1.12666800 | 1.13269800  | -2.91294500 |
| F  | -1.27323700 | -1.01311600 | -3.13757600 |
| C  | 1.67224000  | 0.93914000  | -1.06094600 |
| H  | 2.08089200  | 0.63853300  | -2.02475100 |
| H  | 0.98108800  | 1.77881500  | -1.17844800 |
| C  | 2.63621200  | 1.07489900  | 0.02929400  |
| C  | 3.94685900  | 0.59354200  | -0.10894900 |

|   |            |            |             |
|---|------------|------------|-------------|
| C | 2.27789600 | 1.70476500 | 1.23194400  |
| C | 4.87107200 | 0.75036000 | 0.91352100  |
| C | 3.20137200 | 1.85703000 | 2.25550700  |
| C | 4.50192400 | 1.38142500 | 2.09926400  |
| H | 4.23033900 | 0.08964500 | -1.03210000 |
| H | 1.25473100 | 2.06041700 | 1.35642400  |
| H | 5.88599900 | 0.37722800 | 0.78716700  |
| H | 2.90828900 | 2.34959900 | 3.18132400  |
| H | 5.22721400 | 1.50161500 | 2.90233100  |

<sup>oss</sup>TS5-p

|    |             |             |             |
|----|-------------|-------------|-------------|
| Cu | -0.23895300 | 0.23937900  | 0.13777500  |
| N  | 1.19069000  | -1.34869200 | 0.36690600  |
| C  | 0.88910500  | -2.59824900 | 0.70791700  |
| H  | -0.14751000 | -2.77155300 | 1.00237500  |
| C  | 1.82593100  | -3.62349900 | 0.68550200  |
| H  | 1.54318400  | -4.63226400 | 0.97460400  |
| C  | 3.11718100  | -3.31884100 | 0.27457100  |
| H  | 3.88125800  | -4.09243000 | 0.23045400  |
| C  | 3.42667600  | -2.01587000 | -0.09140700 |
| H  | 4.42807400  | -1.77361600 | -0.43744300 |
| C  | 2.43325200  | -1.03861000 | -0.03162000 |
| N  | 1.60067100  | 1.16980900  | -0.50306300 |
| C  | 2.67798300  | 0.37695400  | -0.40864000 |
| C  | 3.95643500  | 0.88180200  | -0.64455500 |
| H  | 4.83395600  | 0.24827600  | -0.54512600 |
| C  | 4.10368800  | 2.21932900  | -0.98666400 |
| H  | 5.09530100  | 2.62768800  | -1.17135100 |
| C  | 2.97821400  | 3.02720900  | -1.07873100 |
| H  | 3.05203400  | 4.08020400  | -1.33721400 |
| C  | 1.74014000  | 2.45339700  | -0.81808800 |
| H  | 0.82103100  | 3.03804800  | -0.85378300 |
| C  | -0.69201800 | -0.46955700 | -1.65126600 |
| C  | 0.04530900  | 1.07251600  | 1.91799300  |
| F  | -1.29456600 | -1.69184400 | -1.59366600 |
| F  | -1.50305100 | 0.30566500  | -2.40871000 |
| F  | 0.41399300  | -0.67633600 | -2.42351300 |
| F  | -0.23885800 | 2.41049500  | 1.85566800  |
| F  | -0.68348900 | 0.61320000  | 2.97903000  |
| F  | 1.33332900  | 1.01335900  | 2.35005800  |
| C  | -2.63922700 | -1.64276100 | 1.58596700  |
| H  | -2.78057000 | -2.71053700 | 1.42158000  |
| H  | -2.06313100 | -1.32288600 | 2.45254200  |
| C  | -3.21970800 | -0.70540900 | 0.71993900  |

|   |             |             |             |
|---|-------------|-------------|-------------|
| C | -3.98105800 | -1.11236300 | -0.40957000 |
| C | -3.05433100 | 0.69534600  | 0.93046700  |
| C | -4.54427400 | -0.18404900 | -1.26068600 |
| C | -3.61456400 | 1.61617500  | 0.05800800  |
| C | -4.36326300 | 1.18693800  | -1.03839200 |
| H | -4.10333700 | -2.17904300 | -0.59748800 |
| H | -2.52873500 | 1.03208100  | 1.82012200  |
| H | -5.12285000 | -0.52061200 | -2.11953100 |
| H | -3.47561500 | 2.68041700  | 0.24417300  |
| H | -4.80203200 | 1.91281700  | -1.72057300 |

**cssTS6-p**

|    |             |             |             |
|----|-------------|-------------|-------------|
| Cu | -0.11004200 | -0.79306400 | -0.08238500 |
| N  | -2.16233000 | -0.29261500 | 0.25176000  |
| C  | -3.11938200 | -1.21714400 | 0.30176100  |
| H  | -2.77921100 | -2.24909000 | 0.38299100  |
| C  | -4.47106100 | -0.90488000 | 0.25037100  |
| H  | -5.21834900 | -1.69264500 | 0.29771300  |
| C  | -4.82837700 | 0.43143500  | 0.12444100  |
| H  | -5.87520300 | 0.72329200  | 0.06688400  |
| C  | -3.83265300 | 1.39560800  | 0.05751900  |
| H  | -4.09972500 | 2.44117300  | -0.07185600 |
| C  | -2.49551600 | 1.00137400  | 0.12904700  |
| N  | -0.14751800 | 1.44065200  | -0.12688300 |
| C  | -1.37253000 | 1.96637100  | 0.03261500  |
| C  | -1.57050900 | 3.34703100  | 0.08071500  |
| H  | -2.56131200 | 3.76435600  | 0.24124500  |
| C  | -0.47918900 | 4.19233400  | -0.06457200 |
| H  | -0.61511300 | 5.27153400  | -0.02645300 |
| C  | 0.77916900  | 3.64108400  | -0.26166700 |
| H  | 1.66081100  | 4.26348400  | -0.39177500 |
| C  | 0.89379100  | 2.25550500  | -0.28157900 |
| H  | 1.85966400  | 1.77420300  | -0.43562800 |
| C  | 0.30743200  | -1.21101300 | 1.99873700  |
| C  | -0.23193300 | -1.36767500 | -1.99481000 |
| F  | -0.62028800 | -2.17495800 | 2.12035500  |
| F  | 1.20350100  | -1.44257800 | 2.98299500  |
| F  | -0.24528700 | -0.03955900 | 2.37765500  |
| F  | 0.01562300  | -0.36767400 | -2.89591600 |
| F  | 0.64589700  | -2.36993700 | -2.37704400 |
| F  | -1.45512700 | -1.85366200 | -2.36685300 |
| C  | 1.61818900  | -1.78972000 | 0.55998500  |
| H  | 1.91744600  | -2.45894000 | 1.36584400  |
| H  | 1.34859800  | -2.41272200 | -0.29911300 |



|   |            |             |             |
|---|------------|-------------|-------------|
| C | 2.64079600 | -0.75919100 | 0.24345500  |
| C | 3.29228000 | -0.03628200 | 1.25113900  |
| C | 2.99164400 | -0.51844000 | -1.09233600 |
| C | 4.26924000 | 0.89970600  | 0.93179500  |
| C | 3.97704400 | 0.41036000  | -1.40711400 |
| C | 4.61725300 | 1.12574200  | -0.39765700 |
| H | 3.03068700 | -0.21355900 | 2.29249700  |
| H | 2.48050700 | -1.06751800 | -1.88167900 |
| H | 4.76746600 | 1.45048700  | 1.72830800  |
| H | 4.24264400 | 0.57702000  | -2.44977000 |
| H | 5.38824700 | 1.85359100  | -0.64597500 |

<sup>oss</sup>TS7-p

|    |             |             |             |
|----|-------------|-------------|-------------|
| Cu | -0.95921700 | -0.70594100 | -1.01935800 |
| N  | -2.45930400 | -0.79016300 | 0.68677200  |
| C  | -2.81303000 | -1.84824900 | 1.40874800  |
| H  | -2.15343300 | -2.71286400 | 1.32692700  |
| C  | -3.95137700 | -1.85588200 | 2.21022000  |
| H  | -4.20885300 | -2.73733900 | 2.79209900  |
| C  | -4.74463700 | -0.71557000 | 2.23462900  |
| H  | -5.65018600 | -0.68481300 | 2.83757300  |
| C  | -4.38057600 | 0.38725100  | 1.47074200  |
| H  | -5.00901400 | 1.27509800  | 1.45761300  |
| C  | -3.21645400 | 0.31352500  | 0.70689900  |
| N  | -1.79421600 | 1.10592300  | -1.06280600 |
| C  | -2.73840900 | 1.42235600  | -0.15305600 |
| C  | -3.22054700 | 2.72478300  | -0.04136600 |
| H  | -3.96253400 | 2.97260900  | 0.71367700  |
| C  | -2.72396900 | 3.71037800  | -0.88318800 |
| H  | -3.08810100 | 4.73261000  | -0.80264700 |
| C  | -1.75545900 | 3.37496300  | -1.82102200 |
| H  | -1.33958900 | 4.11392700  | -2.50057900 |
| C  | -1.31913600 | 2.05848200  | -1.87185800 |
| H  | -0.56182500 | 1.73757600  | -2.58558700 |
| C  | 0.97685900  | 0.39468400  | 0.51306700  |
| C  | -0.05440600 | -2.35820900 | -1.37016400 |
| F  | 1.54349100  | 0.89100600  | -0.55739800 |
| F  | 0.13865500  | 1.14713600  | 1.19619300  |
| F  | 1.36535600  | -0.74574500 | 1.00995700  |
| F  | 1.26862100  | -2.28863000 | -1.68015300 |
| F  | -0.09984400 | -3.18741100 | -0.26818800 |
| F  | -0.60478000 | -3.10788700 | -2.36759100 |
| C  | 3.92301000  | 0.97733400  | 1.25197500  |
| C  | 4.51900500  | 1.64988500  | 0.15605700  |

|   |            |             |             |
|---|------------|-------------|-------------|
| C | 4.49664600 | -0.25370100 | 1.65694200  |
| C | 5.62608600 | 1.12603200  | -0.48599500 |
| C | 5.60329800 | -0.77078200 | 1.00853800  |
| C | 6.17820800 | -0.08616700 | -0.06509700 |
| H | 4.08408900 | 2.59370700  | -0.17540300 |
| H | 4.04207700 | -0.79281200 | 2.48867600  |
| H | 6.06790200 | 1.66088600  | -1.32570600 |
| H | 6.02576600 | -1.71976400 | 1.33550400  |
| H | 7.04845100 | -0.49739600 | -0.57339900 |
| C | 2.76574600 | 1.48810800  | 1.87507700  |
| H | 2.37190200 | 1.02759200  | 2.78000000  |
| H | 2.39662900 | 2.48142100  | 1.62258300  |

**ossTS7-s**

|    |             |             |             |
|----|-------------|-------------|-------------|
| Cu | -1.09619500 | -0.82076800 | -0.97879100 |
| N  | -2.58396000 | -0.71081300 | 0.72901200  |
| C  | -2.98110800 | -1.70450200 | 1.51645400  |
| H  | -2.35184300 | -2.59522800 | 1.49603500  |
| C  | -4.12502600 | -1.61547500 | 2.30462700  |
| H  | -4.41995100 | -2.44473200 | 2.94275900  |
| C  | -4.87584600 | -0.44789200 | 2.24261600  |
| H  | -5.78409200 | -0.34303700 | 2.83309200  |
| C  | -4.46691200 | 0.58606500  | 1.40780600  |
| H  | -5.06363100 | 1.49211400  | 1.32717200  |
| C  | -3.30026000 | 0.41758200  | 0.66286200  |
| N  | -1.83263400 | 1.02570300  | -1.14356000 |
| C  | -2.77221200 | 1.44267200  | -0.26953300 |
| C  | -3.20329500 | 2.76751700  | -0.25645700 |
| H  | -3.94238000 | 3.09683900  | 0.46976200  |
| C  | -2.65928800 | 3.67088300  | -1.15905100 |
| H  | -2.98339100 | 4.70963000  | -1.15544100 |
| C  | -1.69419200 | 3.23288700  | -2.05722900 |
| H  | -1.24129000 | 3.90556300  | -2.78056400 |
| C  | -1.31064100 | 1.89998300  | -2.01021700 |
| H  | -0.55593600 | 1.50048700  | -2.68601400 |
| C  | 0.98039300  | 0.29200300  | 0.40533000  |
| C  | -0.33328800 | -2.56793400 | -1.16519900 |
| F  | 1.47325000  | 0.73001800  | -0.72720900 |
| F  | 0.16931300  | 1.07067900  | 1.09110600  |
| F  | 1.40000900  | -0.82147700 | 0.93356200  |
| F  | 0.97274400  | -2.66377800 | -1.52862700 |
| F  | -0.40028900 | -3.24536100 | 0.03807800  |
| F  | -0.99606600 | -3.38326000 | -2.03496700 |
| C  | 3.96105900  | 0.80776300  | 1.01219500  |

|   |            |             |             |
|---|------------|-------------|-------------|
| C | 4.66567600 | 1.31508800  | -0.10570700 |
| C | 4.36240200 | -0.45256400 | 1.51821400  |
| C | 5.70681400 | 0.60172600  | -0.67612800 |
| C | 5.40241300 | -1.15905300 | 0.94240900  |
| C | 6.08413600 | -0.63831300 | -0.15953400 |
| H | 4.38561500 | 2.28294200  | -0.52059000 |
| H | 3.83074900 | -0.86337500 | 2.37709300  |
| H | 6.23389800 | 1.01399600  | -1.53577000 |
| H | 5.68833900 | -2.12714400 | 1.35106100  |
| H | 6.90193500 | -1.19579800 | -0.61263000 |
| C | 2.86539800 | 1.49906100  | 1.59566800  |
| C | 2.49326400 | 2.89619000  | 1.23541300  |
| H | 3.28697700 | 3.61704300  | 1.49368600  |
| H | 2.31214400 | 3.00624100  | 0.15441200  |
| H | 1.58186300 | 3.21132600  | 1.75556800  |
| H | 2.45923600 | 1.08765800  | 2.52244200  |

**ossTS7-t**

|    |             |             |             |
|----|-------------|-------------|-------------|
| Cu | 1.21050600  | 0.97741200  | -1.03909800 |
| N  | 2.41481300  | 0.74955100  | 0.89069200  |
| C  | 2.60822900  | 1.65692300  | 1.84250000  |
| H  | 1.91170000  | 2.49648300  | 1.83522300  |
| C  | 3.63570200  | 1.54714600  | 2.77581100  |
| H  | 3.76313500  | 2.30459900  | 3.54524600  |
| C  | 4.49110800  | 0.45590300  | 2.68677100  |
| H  | 5.31535300  | 0.34130500  | 3.38823200  |
| C  | 4.29640400  | -0.48587000 | 1.68293800  |
| H  | 4.97832800  | -1.32744900 | 1.58130800  |
| C  | 3.23329800  | -0.30549300 | 0.79928400  |
| N  | 2.12569100  | -0.77086000 | -1.28511100 |
| C  | 2.93674300  | -1.23853100 | -0.31378300 |
| C  | 3.44679900  | -2.53406500 | -0.36506100 |
| H  | 4.07780200  | -2.90610700 | 0.43849100  |
| C  | 3.11471900  | -3.35628500 | -1.43281600 |
| H  | 3.50033500  | -4.37266400 | -1.48098100 |
| C  | 2.27948800  | -2.86709600 | -2.42945300 |
| H  | 1.99239700  | -3.47598000 | -3.28244700 |
| C  | 1.80805500  | -1.56727000 | -2.31144800 |
| H  | 1.15112400  | -1.13036600 | -3.06216800 |
| C  | -0.83989200 | -0.46538100 | 0.12041900  |
| C  | 0.28722100  | 2.65459900  | -1.11513600 |
| F  | -1.38342000 | -0.64450300 | -1.05529000 |
| F  | -0.05217500 | -1.40230300 | 0.60709600  |
| F  | -1.16259700 | 0.55304400  | 0.86650500  |

|   |             |             |             |
|---|-------------|-------------|-------------|
| F | -1.02826400 | 2.62691600  | -1.45987400 |
| F | 0.29323400  | 3.25317200  | 0.13158300  |
| F | 0.84015500  | 3.59480900  | -1.93159300 |
| C | -3.81871000 | -0.90013900 | 0.71234700  |
| C | -4.46684500 | -1.08742800 | -0.53262300 |
| C | -4.21157800 | 0.22902000  | 1.47065600  |
| C | -5.43152200 | -0.20350100 | -0.98641700 |
| C | -5.17542800 | 1.11010100  | 1.01009900  |
| C | -5.79432000 | 0.90457200  | -0.22216800 |
| H | -4.20992200 | -1.94712700 | -1.14881900 |
| H | -3.74873900 | 0.41481700  | 2.43787500  |
| H | -5.90862400 | -0.37984900 | -1.94973400 |
| H | -5.44855900 | 1.97080700  | 1.61908300  |
| H | -6.55009900 | 1.59990900  | -0.58282000 |
| C | -2.79695600 | -1.79828700 | 1.17236000  |
| C | -2.29445400 | -1.71091400 | 2.58070500  |
| H | -1.42856700 | -2.36798600 | 2.72887700  |
| H | -1.98434300 | -0.69445400 | 2.85971100  |
| H | -3.06397500 | -2.01568400 | 3.31055200  |
| C | -2.53908500 | -3.07847900 | 0.43879700  |
| H | -3.38198100 | -3.78436700 | 0.53452400  |
| H | -2.38146900 | -2.92551500 | -0.63814200 |
| H | -1.64834200 | -3.58353100 | 0.83222900  |

**<sup>3</sup>TS8-p**

|    |             |             |             |
|----|-------------|-------------|-------------|
| Cu | -0.99309400 | 0.19193700  | -0.40830300 |
| N  | 0.09728500  | 1.90676100  | -0.43663200 |
| C  | -0.26588800 | 3.11022400  | 0.03914400  |
| H  | -1.32963300 | 3.25470500  | 0.20401900  |
| C  | 0.63669600  | 4.11926800  | 0.29959300  |
| H  | 0.28705600  | 5.07712900  | 0.67425000  |
| C  | 2.00058200  | 3.87239300  | 0.06117500  |
| H  | 2.74508300  | 4.64054300  | 0.26079100  |
| C  | 2.38556500  | 2.64580600  | -0.42741000 |
| H  | 3.43796500  | 2.43281000  | -0.60098400 |
| C  | 1.42039500  | 1.65100700  | -0.67266300 |
| N  | 0.67678700  | -0.53385400 | -1.26883200 |
| C  | 1.72966600  | 0.33606500  | -1.17966000 |
| C  | 3.01590800  | -0.06469500 | -1.57525700 |
| H  | 3.84843100  | 0.63079300  | -1.50148500 |
| C  | 3.21969900  | -1.33423500 | -2.06982900 |
| H  | 4.21474500  | -1.64812800 | -2.37896000 |
| C  | 2.12800500  | -2.20690000 | -2.18138200 |
| H  | 2.23731700  | -3.21112700 | -2.58116400 |

|   |             |             |             |
|---|-------------|-------------|-------------|
| C | 0.88738700  | -1.75800600 | -1.77484500 |
| H | 0.01473800  | -2.40043200 | -1.84892000 |
| C | -1.88240900 | -1.97369900 | -0.00448600 |
| C | -2.72617100 | 1.03531300  | 0.02676200  |
| F | -1.18251400 | -3.12607800 | -0.00627300 |
| F | -3.02706200 | -2.21083100 | 0.63058300  |
| F | -2.21585300 | -1.77381400 | -1.31834200 |
| F | -2.97284800 | 2.08235600  | -0.80010800 |
| F | -3.81164500 | 0.25055500  | -0.04330000 |
| F | -2.72845400 | 1.56224300  | 1.28587400  |
| C | -0.86362800 | -1.11167000 | 1.68104800  |
| C | 0.57753700  | -1.07002900 | 1.75062900  |
| C | 1.26277300  | 0.13644200  | 2.00333300  |
| C | 1.34070800  | -2.25207500 | 1.61368000  |
| C | 2.64451800  | 0.15788300  | 2.12023300  |
| H | 0.69009200  | 1.05778900  | 2.12998100  |
| C | 2.71986600  | -2.21768900 | 1.70800200  |
| H | 0.82459200  | -3.19150200 | 1.42188300  |
| C | 3.38338300  | -1.01268300 | 1.95748000  |
| H | 3.14868900  | 1.10099900  | 2.32926200  |
| H | 3.29070700  | -3.13797500 | 1.59219100  |
| H | 4.46880300  | -0.99190900 | 2.03767300  |
| H | -1.41389500 | -0.21407700 | 1.97079000  |
| H | -1.32562500 | -2.01234600 | 2.08052600  |

**<sup>3</sup>TS8-s**

|    |             |             |             |
|----|-------------|-------------|-------------|
| Cu | -0.89228700 | 0.44555200  | -0.56383300 |
| N  | 0.34046100  | 2.02012400  | -0.23465400 |
| C  | 0.04271500  | 3.15980600  | 0.41089100  |
| H  | -1.01501800 | 3.35827000  | 0.56023300  |
| C  | 1.00292900  | 4.04376900  | 0.85581500  |
| H  | 0.70757700  | 4.95622800  | 1.36586800  |
| C  | 2.35484700  | 3.73143200  | 0.62122900  |
| H  | 3.14324400  | 4.40117000  | 0.95912000  |
| C  | 2.67274000  | 2.56728500  | -0.03823500 |
| H  | 3.71414900  | 2.30451300  | -0.21051500 |
| C  | 1.65126600  | 1.69534000  | -0.46260000 |
| N  | 0.77812600  | -0.33242800 | -1.36119300 |
| C  | 1.88548200  | 0.44000400  | -1.13035400 |
| C  | 3.15520300  | -0.00555000 | -1.53371500 |
| H  | 4.03016500  | 0.61537000  | -1.35602100 |
| C  | 3.29051300  | -1.22507000 | -2.15909800 |
| H  | 4.27326100  | -1.57368000 | -2.47065200 |
| C  | 2.14697500  | -2.00088400 | -2.40065400 |

|   |             |             |             |
|---|-------------|-------------|-------------|
| H | 2.20404500  | -2.96357800 | -2.90070400 |
| C | 0.92460000  | -1.50802700 | -1.99090800 |
| H | 0.01216700  | -2.07109900 | -2.16406500 |
| C | -1.96359700 | -1.69210400 | -0.34915200 |
| C | -2.58465500 | 1.36046900  | -0.13642300 |
| F | -1.39689700 | -2.91690900 | -0.40581600 |
| F | -3.22214900 | -1.86875100 | 0.05160400  |
| F | -2.07357700 | -1.32456500 | -1.68272000 |
| F | -2.65546300 | 2.56128300  | -0.76678200 |
| F | -3.70896700 | 0.70940700  | -0.46866600 |
| F | -2.69697500 | 1.64797700  | 1.19318900  |
| C | -0.96301200 | -1.08897500 | 1.60886100  |
| C | -1.81791800 | -2.05960500 | 2.36782700  |
| H | -1.69345200 | -3.09774800 | 2.04293200  |
| H | -1.49698000 | -2.00695900 | 3.42022000  |
| H | -2.87754800 | -1.79920100 | 2.32753500  |
| C | 0.47203500  | -1.29100300 | 1.59803700  |
| C | 1.32684700  | -0.21487200 | 1.91340000  |
| C | 1.05615200  | -2.55612100 | 1.37021000  |
| C | 2.69898200  | -0.39559800 | 2.00519400  |
| H | 0.89483200  | 0.76639600  | 2.11877100  |
| C | 2.42881100  | -2.72008300 | 1.42989800  |
| H | 0.42065600  | -3.40119300 | 1.11504000  |
| C | 3.26127900  | -1.64308100 | 1.74671200  |
| H | 3.33312000  | 0.45172600  | 2.26536300  |
| H | 2.86145200  | -3.69950100 | 1.23072900  |
| H | 4.33961600  | -1.78190600 | 1.80086100  |
| H | -1.27197900 | -0.05244300 | 1.76850400  |

**<sup>3</sup>TS8-t**

|    |             |             |             |
|----|-------------|-------------|-------------|
| Cu | -0.96065300 | 0.45493000  | -0.64143800 |
| N  | 0.15672100  | 2.06373000  | -0.10493100 |
| C  | -0.23998900 | 3.13520800  | 0.59726600  |
| H  | -1.30948500 | 3.21812000  | 0.77253600  |
| C  | 0.64022800  | 4.08184400  | 1.08165000  |
| H  | 0.26787900  | 4.93524900  | 1.64103300  |
| C  | 2.01055900  | 3.90778000  | 0.82275500  |
| H  | 2.73795200  | 4.62922600  | 1.18985200  |
| C  | 2.42785100  | 2.81349200  | 0.10011600  |
| H  | 3.48670400  | 2.65794900  | -0.09427500 |
| C  | 1.48633800  | 1.87561400  | -0.36328800 |
| N  | 0.78778800  | -0.14830400 | -1.40901100 |
| C  | 1.82455800  | 0.69802100  | -1.12583600 |
| C  | 3.11991800  | 0.40079300  | -1.57617800 |

|   |             |             |             |
|---|-------------|-------------|-------------|
| H | 3.94052300  | 1.08204500  | -1.36370100 |
| C | 3.34845600  | -0.75200600 | -2.29825100 |
| H | 4.35148100  | -0.98453500 | -2.65105900 |
| C | 2.27885200  | -1.61308100 | -2.57214800 |
| H | 2.41350400  | -2.53136000 | -3.13676500 |
| C | 1.02253800  | -1.26247700 | -2.11176600 |
| H | 0.15834600  | -1.89338300 | -2.30246400 |
| C | -1.73310100 | -1.90769000 | -0.34558600 |
| C | -2.73663700 | 1.25159200  | -0.32799400 |
| F | -1.15572800 | -3.10155300 | -0.63252700 |
| F | -2.97729900 | -2.18919700 | 0.07245900  |
| F | -1.93416200 | -1.36540900 | -1.64064100 |
| F | -2.84884200 | 2.28982500  | -1.19822500 |
| F | -3.79112700 | 0.45668400  | -0.55284600 |
| F | -2.94789400 | 1.79752500  | 0.90236200  |
| C | -0.63478800 | -1.56947900 | 1.73383300  |
| C | -1.12037200 | -2.92067300 | 2.17567500  |
| H | -0.66842500 | -3.75753000 | 1.63993100  |
| H | -0.84536100 | -3.02559600 | 3.23908000  |
| H | -2.20857000 | -3.00667200 | 2.10608500  |
| C | 0.79305600  | -1.42024900 | 1.53909700  |
| C | 1.48792100  | -0.26947900 | 1.97567600  |
| C | 1.56760200  | -2.47087500 | 0.98689900  |
| C | 2.87248800  | -0.19975500 | 1.91441200  |
| H | 0.94045500  | 0.56549400  | 2.41214600  |
| C | 2.94361400  | -2.38110500 | 0.90354400  |
| H | 1.06637200  | -3.34973200 | 0.58690400  |
| C | 3.61342100  | -1.24838800 | 1.37570100  |
| H | 3.37479000  | 0.69351200  | 2.28569200  |
| H | 3.50736500  | -3.20074600 | 0.45945500  |
| H | 4.69926900  | -1.18899800 | 1.32489600  |
| C | -1.43720500 | -0.46232900 | 2.34182600  |
| H | -1.15387700 | 0.54042900  | 2.00918000  |
| H | -2.50200600 | -0.59868700 | 2.12098100  |
| H | -1.32592600 | -0.49715300 | 3.44011300  |

**css**INT1-p

|    |             |             |             |
|----|-------------|-------------|-------------|
| Cu | -1.08296100 | -0.35113500 | 0.33186400  |
| N  | -0.08970200 | 1.49334800  | -0.49819600 |
| C  | -0.43221500 | 2.76471000  | -0.31505800 |
| H  | -1.37966200 | 2.92872900  | 0.19950500  |
| C  | 0.36435300  | 3.82011800  | -0.74449500 |
| H  | 0.05457300  | 4.84826200  | -0.57548900 |
| C  | 1.55820700  | 3.51832700  | -1.39081400 |

|   |             |             |             |
|---|-------------|-------------|-------------|
| H | 2.21383000  | 4.31364500  | -1.74021500 |
| C | 1.91215300  | 2.19095400  | -1.58673100 |
| H | 2.85052000  | 1.94511600  | -2.07762300 |
| C | 1.05632500  | 1.19256700  | -1.11931600 |
| N | 0.46554700  | -1.09804100 | -0.69591500 |
| C | 1.34482500  | -0.25414400 | -1.26244000 |
| C | 2.45260100  | -0.74822900 | -1.94913700 |
| H | 3.16723000  | -0.06934400 | -2.40622200 |
| C | 2.63480300  | -2.11946600 | -2.05261400 |
| H | 3.49646900  | -2.51541200 | -2.58608400 |
| C | 1.70508000  | -2.97651000 | -1.47691200 |
| H | 1.80546800  | -4.05633600 | -1.54376300 |
| C | 0.62976300  | -2.41572200 | -0.80419000 |
| H | -0.13321100 | -3.03170100 | -0.32763900 |
| C | -2.68534400 | -0.04659300 | 1.39080300  |
| C | -2.19557300 | -0.51479600 | -1.32277200 |
| F | -2.63750800 | -0.33514500 | 2.70214100  |
| F | -2.93363300 | 1.28421300  | 1.31194100  |
| F | -3.77497100 | -0.67836800 | 0.93763500  |
| F | -1.46596600 | -0.31976800 | -2.45367900 |
| F | -2.70822100 | -1.76095400 | -1.44608300 |
| F | -3.22310600 | 0.34657200  | -1.42264300 |
| C | -0.04220900 | -0.24674100 | 2.07455400  |
| H | -0.43350900 | 0.66678300  | 2.53554500  |
| H | -0.40209500 | -1.12452300 | 2.62114800  |
| C | 1.41757200  | -0.22107200 | 1.92343800  |
| C | 2.11939400  | 0.98586400  | 1.77584000  |
| C | 2.16875400  | -1.40935800 | 1.90658000  |
| C | 3.49730200  | 1.00450700  | 1.59238000  |
| C | 3.54411800  | -1.39499200 | 1.72390200  |
| C | 4.21831200  | -0.18567200 | 1.55595700  |
| H | 1.56280600  | 1.92496800  | 1.80479100  |
| H | 1.64637600  | -2.35899000 | 2.04130200  |
| H | 4.01163100  | 1.95897400  | 1.47962400  |
| H | 4.09783100  | -2.33356800 | 1.71670000  |
| H | 5.29802500  | -0.17230900 | 1.41546800  |

**cssINT1-s**

|    |             |             |            |
|----|-------------|-------------|------------|
| Cu | -0.08734900 | -0.71490000 | 0.08415700 |
| N  | 0.24870100  | 1.24052200  | 0.42148700 |
| C  | 1.42571500  | 1.65296800  | 0.90102100 |
| H  | 2.17829900  | 0.88283000  | 1.05257900 |
| C  | 1.68822300  | 2.98058200  | 1.20661700 |
| H  | 2.66669600  | 3.26220500  | 1.58615200 |



|   |             |             |             |
|---|-------------|-------------|-------------|
| C | 0.67827400  | 3.91080700  | 1.01518000  |
| H | 0.83776100  | 4.96262900  | 1.24404200  |
| C | -0.55080500 | 3.48202100  | 0.53350700  |
| H | -1.35504400 | 4.19866100  | 0.39454400  |
| C | -0.74943900 | 2.13328800  | 0.24315900  |
| N | -2.12382300 | 0.28976300  | -0.41732400 |
| C | -2.04662800 | 1.61597700  | -0.25561600 |
| C | -3.13358100 | 2.44600800  | -0.53863200 |
| H | -3.07047600 | 3.52432300  | -0.41885200 |
| C | -4.31603100 | 1.87329900  | -0.98674900 |
| H | -5.17451200 | 2.50318000  | -1.21187600 |
| C | -4.38883400 | 0.49510600  | -1.14184900 |
| H | -5.29817600 | 0.00888100  | -1.48585600 |
| C | -3.25776600 | -0.25680700 | -0.84383700 |
| H | -3.25379800 | -1.34228700 | -0.94509200 |
| C | -0.67392200 | -2.50559100 | -0.32955900 |
| C | -0.31479300 | -0.96439400 | 2.06892100  |
| F | -1.75733700 | -2.81026400 | 0.41005600  |
| F | -1.09758600 | -2.67429200 | -1.60665000 |
| F | 0.24812700  | -3.45363100 | -0.10708700 |
| F | -0.47790400 | -2.19548800 | 2.58094900  |
| F | 0.81452200  | -0.48513700 | 2.67893200  |
| F | -1.33152700 | -0.21768400 | 2.57267100  |
| C | 0.88431600  | -0.73671100 | -1.72479700 |
| C | 2.24021700  | -0.32785000 | -1.31485800 |
| C | 2.82114400  | 0.89428800  | -1.68744600 |
| C | 2.99043600  | -1.18085600 | -0.48207400 |
| C | 4.09655400  | 1.24522300  | -1.25442800 |
| C | 4.25499500  | -0.82228800 | -0.03672700 |
| C | 4.81774400  | 0.39523700  | -0.42174800 |
| H | 2.26843100  | 1.57755600  | -2.33222000 |
| H | 2.55334400  | -2.13542800 | -0.18349700 |
| H | 4.52899700  | 2.19420200  | -1.57057800 |
| H | 4.80926700  | -1.49939300 | 0.61153100  |
| H | 5.81344500  | 0.67289100  | -0.08002200 |
| C | 0.16239400  | 0.09910800  | -2.74805900 |
| H | -0.82211900 | -0.33057100 | -2.96821600 |
| H | 0.00520600  | 1.13699800  | -2.41902600 |
| H | 0.72266900  | 0.14399200  | -3.69799300 |
| H | 0.89504200  | -1.78860400 | -2.01731200 |

**CSSINT1-t**

|    |             |             |            |
|----|-------------|-------------|------------|
| Cu | -0.03147100 | -0.65442500 | 0.17813800 |
|----|-------------|-------------|------------|

|   |             |             |             |
|---|-------------|-------------|-------------|
| N | 0.16492800  | 1.38251300  | 0.31372800  |
| C | 1.31081500  | 1.91621600  | 0.74892200  |
| H | 2.13548700  | 1.22459200  | 0.89904100  |
| C | 1.46232400  | 3.26876300  | 1.01616200  |
| H | 2.42251900  | 3.64491500  | 1.35881800  |
| C | 0.36434700  | 4.09876400  | 0.85057700  |
| H | 0.43038400  | 5.16333200  | 1.06641500  |
| C | -0.83238200 | 3.54813500  | 0.41585900  |
| H | -1.71110500 | 4.17776000  | 0.30995600  |
| C | -0.90974600 | 2.18258000  | 0.14367900  |
| N | -2.20273600 | 0.21914500  | -0.30818700 |
| C | -2.16655300 | 1.55632400  | -0.32906900 |
| C | -3.25262200 | 2.31148400  | -0.77858700 |
| H | -3.20309600 | 3.39601900  | -0.83100300 |
| C | -4.40445900 | 1.65328800  | -1.18611900 |
| H | -5.26161400 | 2.22243900  | -1.54092400 |
| C | -4.44339700 | 0.26619400  | -1.13958800 |
| H | -5.32678400 | -0.28841200 | -1.44607400 |
| C | -3.30932300 | -0.40713700 | -0.69838100 |
| H | -3.27956600 | -1.49527100 | -0.65942500 |
| C | -0.69428200 | -2.46455200 | 0.09417200  |
| C | -0.09058600 | -0.71422100 | 2.19961000  |
| F | -1.65565900 | -2.62138200 | 1.02478400  |
| F | -1.32773100 | -2.75984800 | -1.06817300 |
| F | 0.21327400  | -3.42634100 | 0.30370100  |
| F | 0.14786400  | -1.91110400 | 2.77326100  |
| F | 0.85449000  | 0.11027200  | 2.74370900  |
| F | -1.26894900 | -0.27919900 | 2.70275500  |
| C | 0.86461400  | -0.84196600 | -1.69912100 |
| C | 2.17068100  | -0.28040500 | -1.24819800 |
| C | 2.71855900  | 0.89375000  | -1.78726800 |
| C | 2.91433500  | -0.94625600 | -0.25448200 |
| C | 3.95287900  | 1.37605600  | -1.36255700 |
| C | 4.13750300  | -0.45270500 | 0.18428100  |
| C | 4.66730600  | 0.71095000  | -0.37077900 |
| H | 2.17506300  | 1.43516900  | -2.56052200 |
| H | 2.51519700  | -1.86071200 | 0.18761000  |
| H | 4.35865800  | 2.28189300  | -1.81218600 |
| H | 4.68141000  | -0.98443900 | 0.96353400  |
| H | 5.63034100  | 1.09171300  | -0.03482900 |
| C | 0.07565400  | 0.00567500  | -2.67104200 |
| H | 0.57667000  | 0.04634900  | -3.65662500 |
| H | -0.91490500 | -0.43990100 | -2.83598200 |
| H | -0.07254700 | 1.03966400  | -2.33308800 |

|   |            |             |             |
|---|------------|-------------|-------------|
| C | 1.10104100 | -2.21661900 | -2.31323400 |
| H | 1.53445300 | -2.94207100 | -1.61801100 |
| H | 0.18332700 | -2.64679000 | -2.72247600 |
| H | 1.81358600 | -2.09702400 | -3.14838500 |

**cssINT2-p**

|    |             |             |             |
|----|-------------|-------------|-------------|
| Cu | -0.11677300 | -0.92690400 | 0.03872300  |
| N  | -2.04990300 | -0.22213200 | 0.01957800  |
| C  | -3.05638500 | -1.09623900 | 0.05280200  |
| H  | -2.77489700 | -2.14530400 | 0.11069500  |
| C  | -4.38568800 | -0.70328700 | 0.01558300  |
| H  | -5.17621200 | -1.44801900 | 0.04468100  |
| C  | -4.66322800 | 0.65479800  | -0.06250600 |
| H  | -5.69118200 | 1.00994900  | -0.09903500 |
| C  | -3.61426700 | 1.56140400  | -0.09410200 |
| H  | -3.82354700 | 2.62525100  | -0.15875400 |
| C  | -2.30001700 | 1.09579900  | -0.04766500 |
| N  | 0.07718700  | 1.41112800  | -0.06656400 |
| C  | -1.12623700 | 2.00180700  | -0.06584200 |
| C  | -1.25969600 | 3.39062200  | -0.07367200 |
| H  | -2.23784300 | 3.86399100  | -0.06437100 |
| C  | -0.11583000 | 4.17703100  | -0.08565700 |
| H  | -0.19953100 | 5.26216100  | -0.09055700 |
| C  | 1.12625300  | 3.56002500  | -0.08867500 |
| H  | 2.04891400  | 4.13468400  | -0.09706900 |
| C  | 1.17014000  | 2.16929700  | -0.07759000 |
| H  | 2.12256000  | 1.64031800  | -0.07742900 |
| C  | -0.26392900 | -1.04183400 | 2.01563300  |
| C  | -0.30065200 | -1.24948300 | -1.91313900 |
| F  | -1.24693300 | -1.95414200 | 2.27146800  |
| F  | 0.76860100  | -1.42600500 | 2.80096600  |
| F  | -0.70144000 | 0.11956500  | 2.55914400  |
| F  | -0.74944700 | -0.15305500 | -2.56961200 |
| F  | 0.71939400  | -1.71550500 | -2.67134500 |
| F  | -1.28579700 | -2.18440900 | -2.05542200 |
| C  | 1.56963100  | -1.95448400 | 0.07548700  |
| H  | 1.54326100  | -2.52236900 | 1.00580000  |
| H  | 1.52487200  | -2.60991900 | -0.79459900 |
| C  | 2.67443100  | -0.97615200 | 0.01838700  |
| C  | 3.24867100  | -0.46754700 | 1.19443300  |
| C  | 3.19522300  | -0.54284800 | -1.21176300 |
| C  | 4.30833000  | 0.42975200  | 1.14210700  |
| C  | 4.25476700  | 0.35450800  | -1.26219400 |
| C  | 4.81772600  | 0.84611000  | -0.08610000 |

|   |            |             |             |
|---|------------|-------------|-------------|
| H | 2.84915300 | -0.78600200 | 2.15456600  |
| H | 2.75272600 | -0.91866900 | -2.13155800 |
| H | 4.74285500 | 0.80346200  | 2.06837900  |
| H | 4.64700600 | 0.66956900  | -2.22828300 |
| H | 5.65245300 | 1.54441200  | -0.12649900 |
